# Supplementary material for: A quadratically regularized functional canonical correlation analysis for identifying the global structure of pleiotropy with NGS data
Source: PubMed Central journal article supplement (PMC5659802; doi:10.1371/journal.pcbi.1005788), 2017-10-17
Supplement: pcbi.1005788.s002.pdf [file pcbi.1005788.s002.pdf]

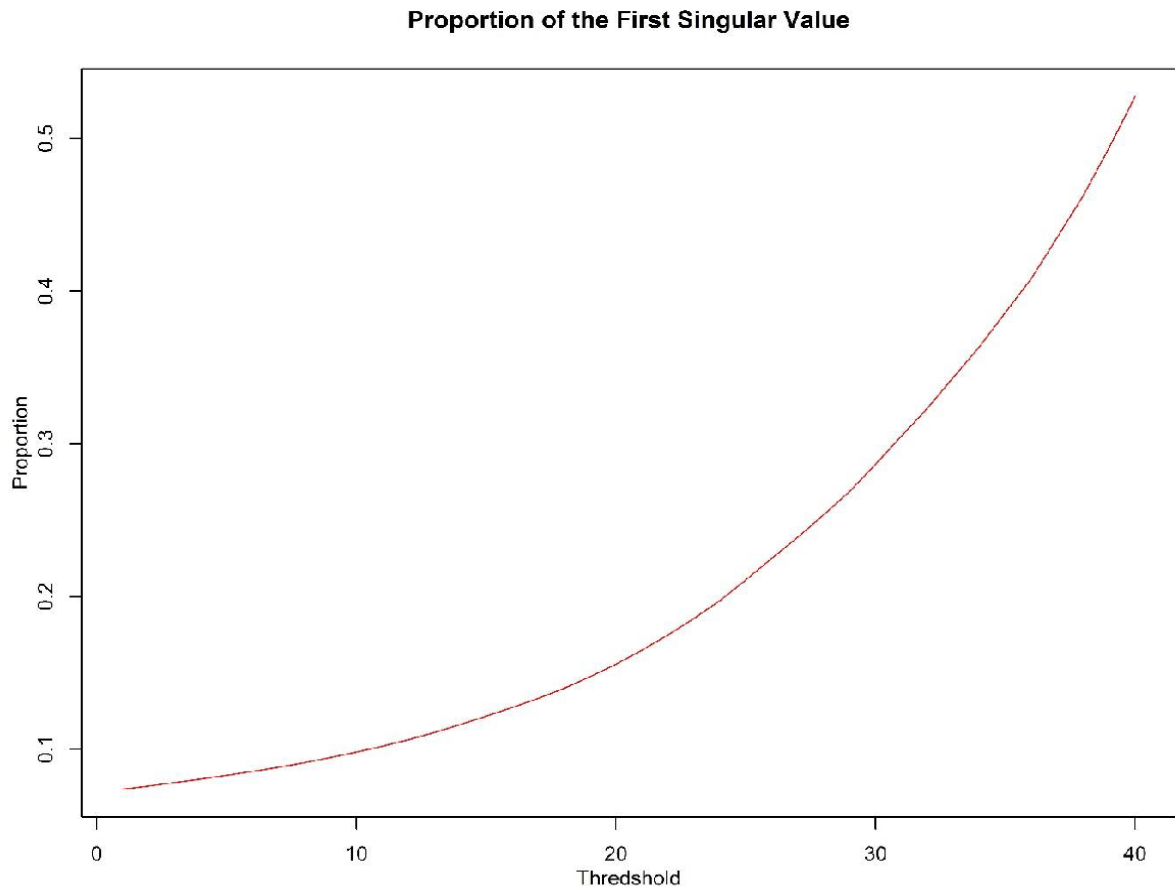

**Fig S1.** Proportion of the first singular value over the total singular values.

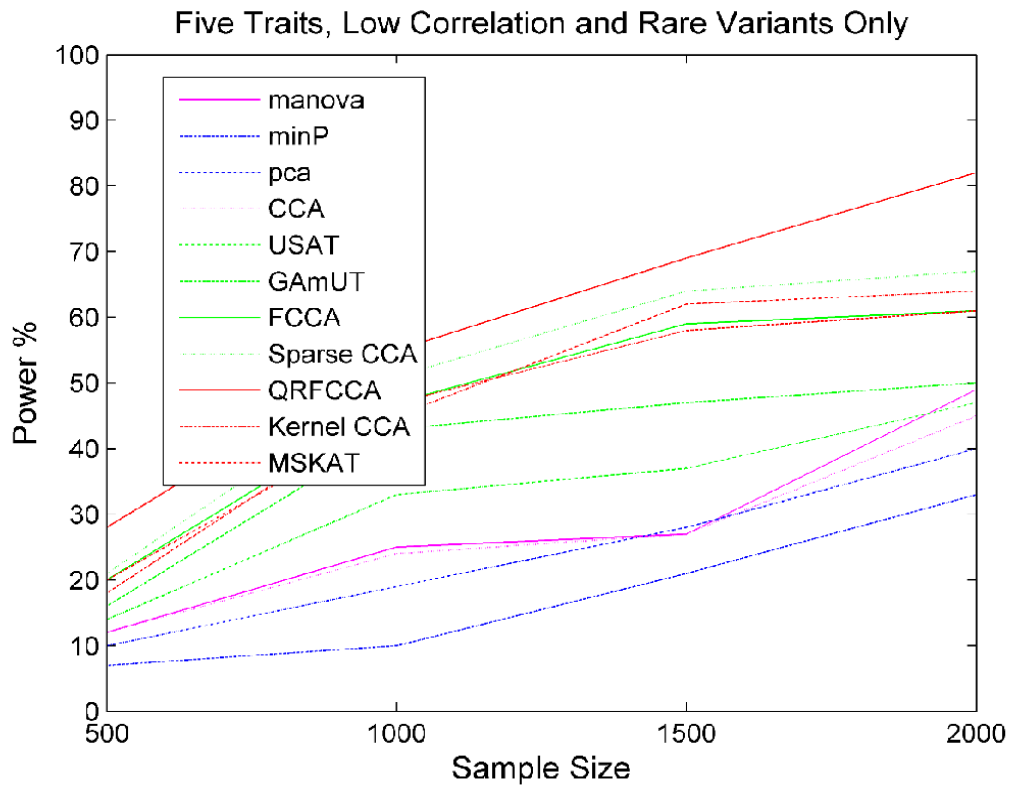

**Fig S2.** The power of curves as a function of sample sizes of 11 statistics for collectively testing the association of all rare variants in the gene with 5 traits with low correlations for scenario 1 at the significance level  $\alpha = 0.05$  .

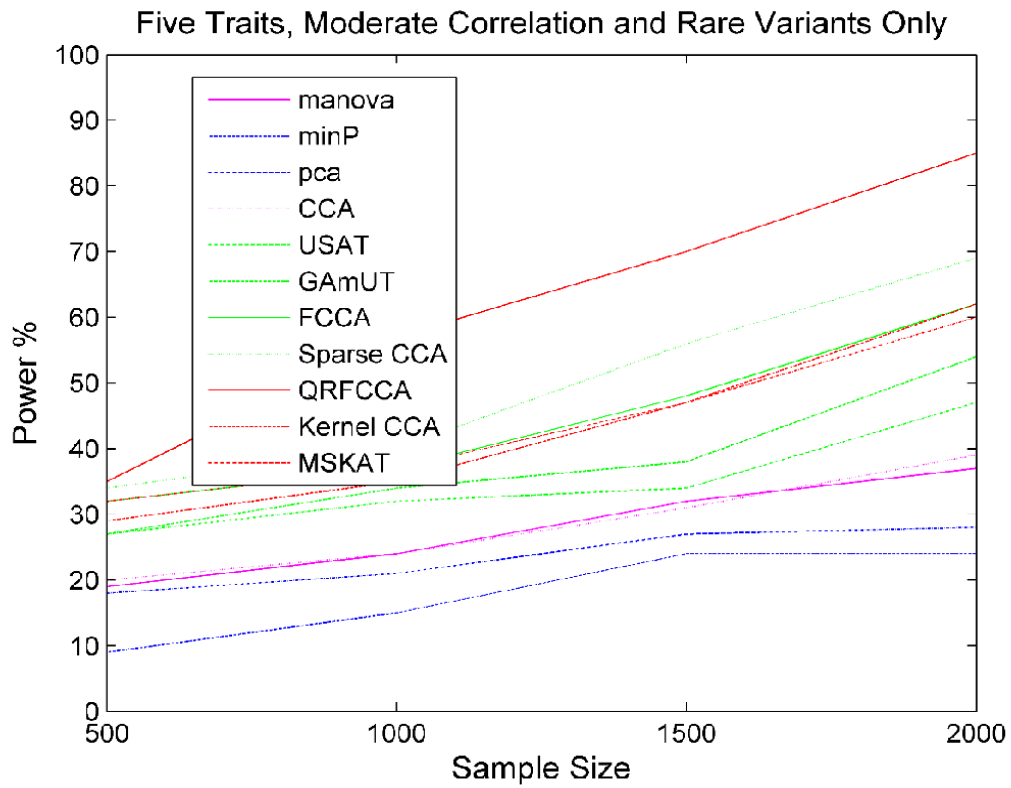

**Fig S3.** The power of curves as a function of sample sizes of 11 statistics for collectively testing the association of all rare variants in the gene with 5 traits with moderate correlations for scenario 1 at the significance level  $\alpha = 0.05$ .

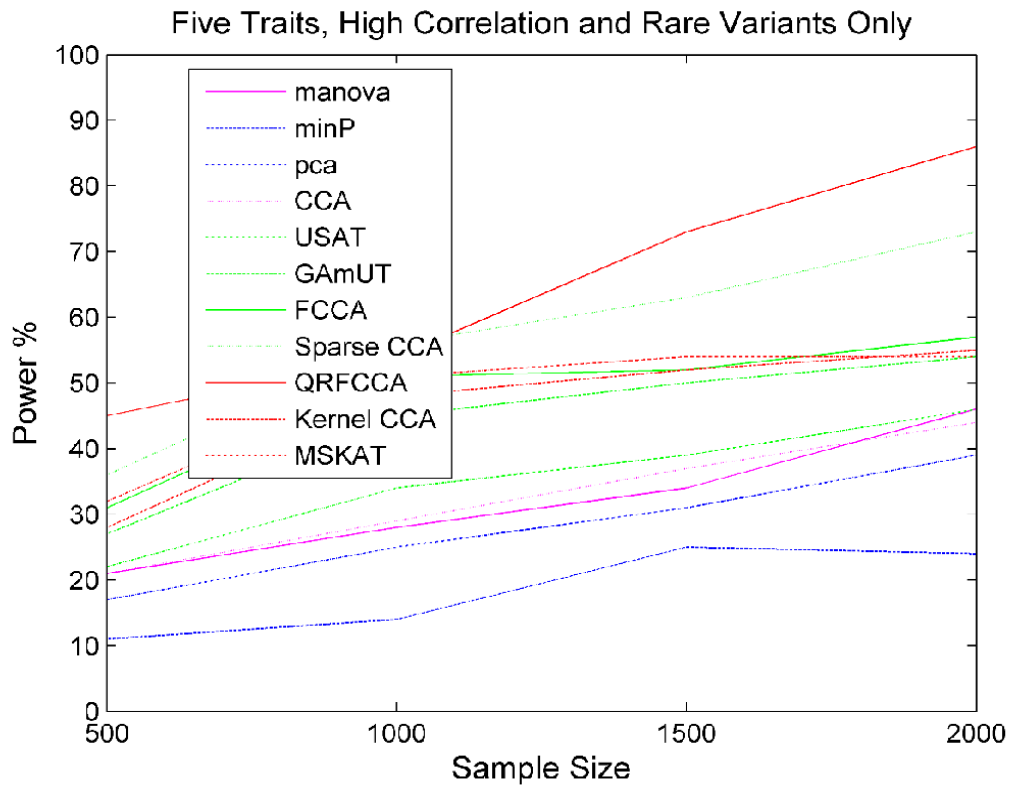

**Fig S4.** The power of curves as a function of sample sizes of 11 statistics for collectively testing the association of all rare variants in the gene with 5 traits with high correlations for scenario 1 at the significance level  $\alpha = 0.05$  .

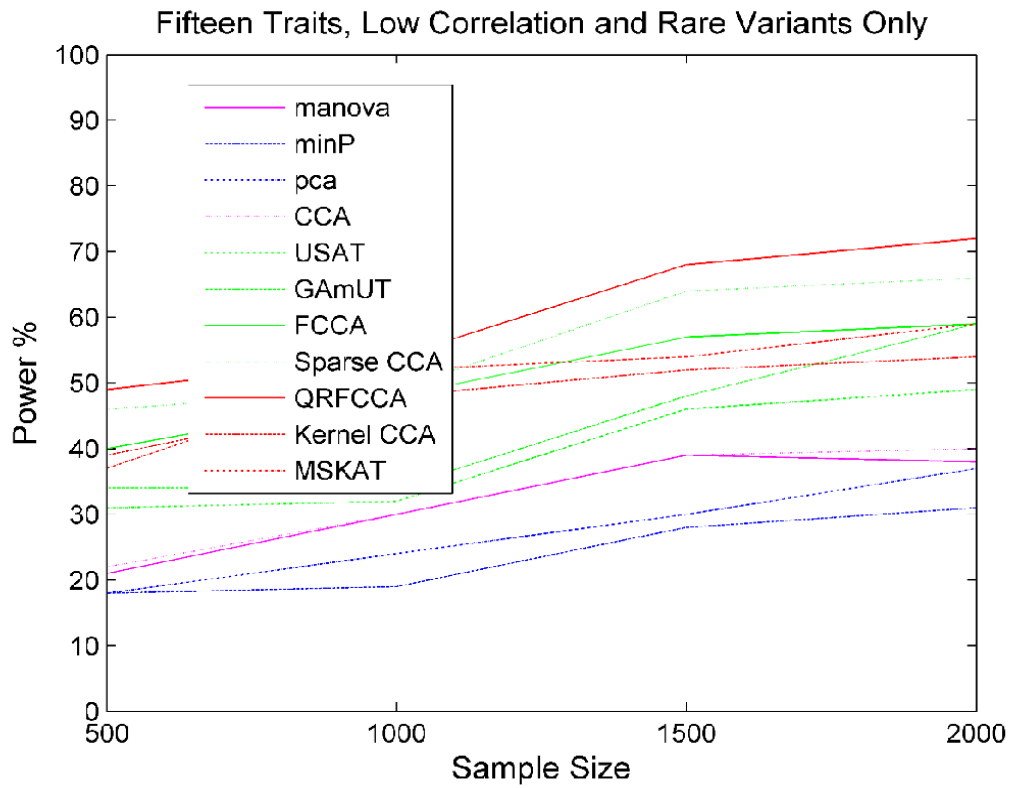

**Fig S5.** The power of curves as a function of sample sizes of 11 statistics for collectively testing the association of all rare variants in the gene with 15 traits with low correlations for scenario 1 at the significance level  $\alpha = 0.05$  .

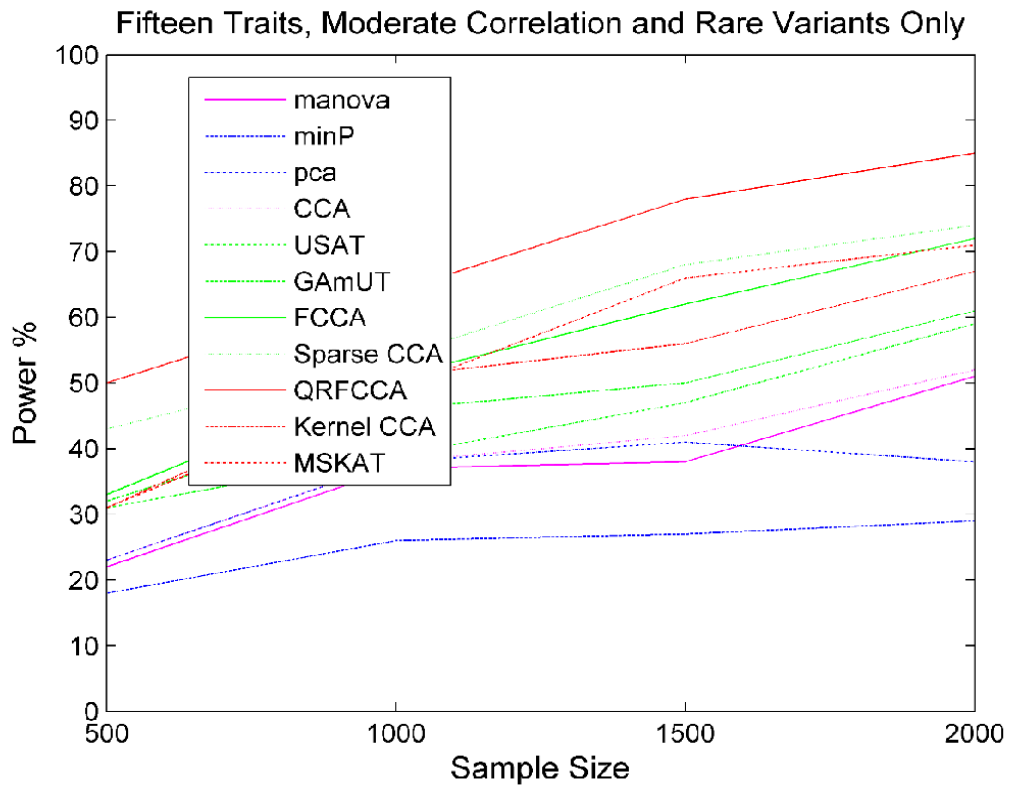

**Fig S6.** The power of curves as a function of sample sizes of 11 statistics for collectively testing the association of all rare variants in the gene with 15 traits with moderate correlations for scenario 1 at the significance level  $\alpha = 0.05$ .

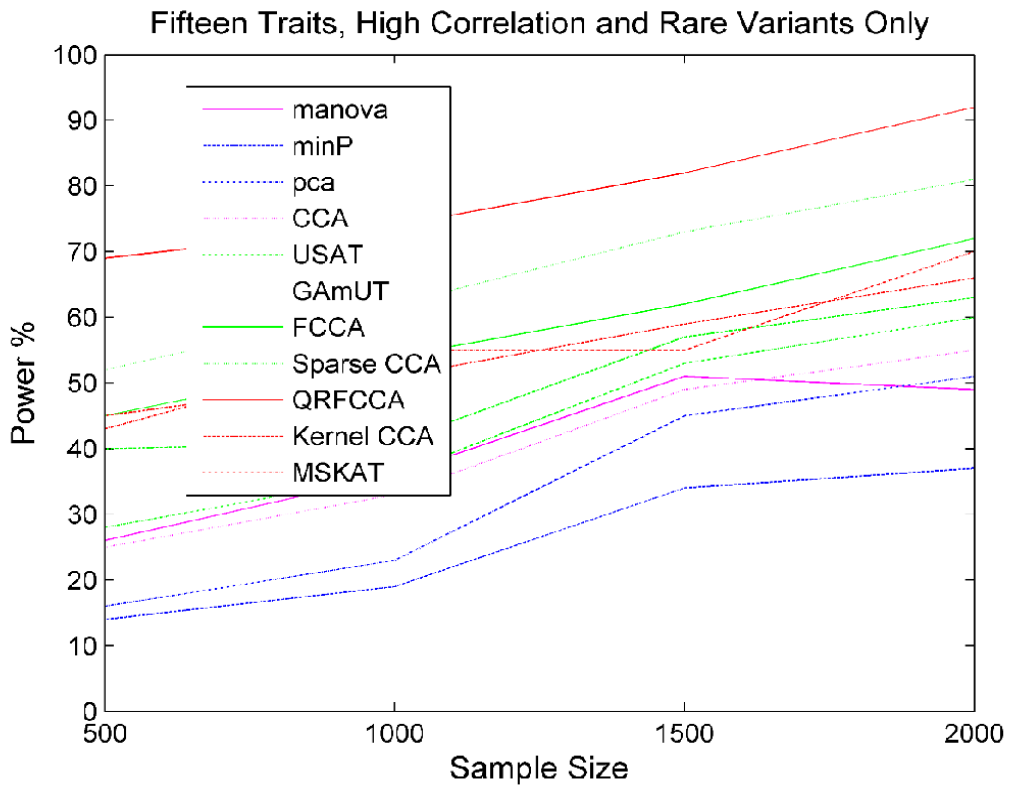

**Fig S7.** The power of curves as a function of sample sizes of 11 statistics for collectively testing the association of all rare variants in the gene with 15 traits with high correlations for the scenario 1 at the significance level  $\alpha = 0.05$ .

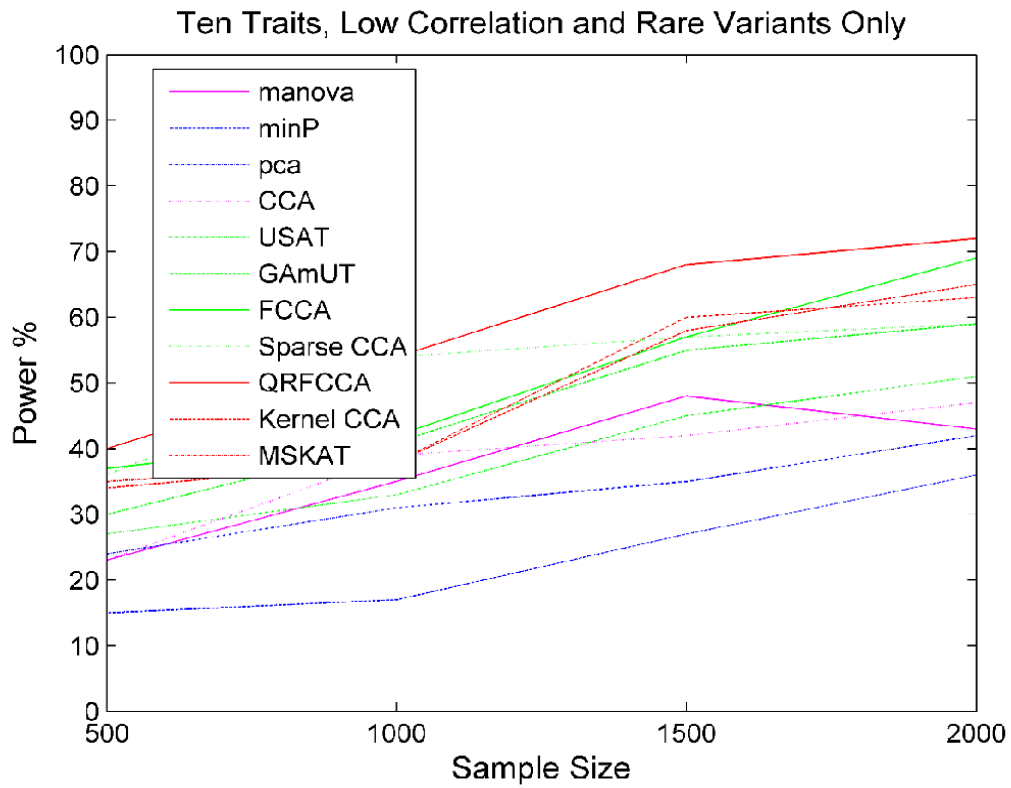

**Fig S8.** The power of curves as a function of sample sizes of 11 statistics for collectively testing the association of all rare variants in the gene with 10 traits with low correlations for the scenario 2 at the significance level  $\alpha = 0.05$ .



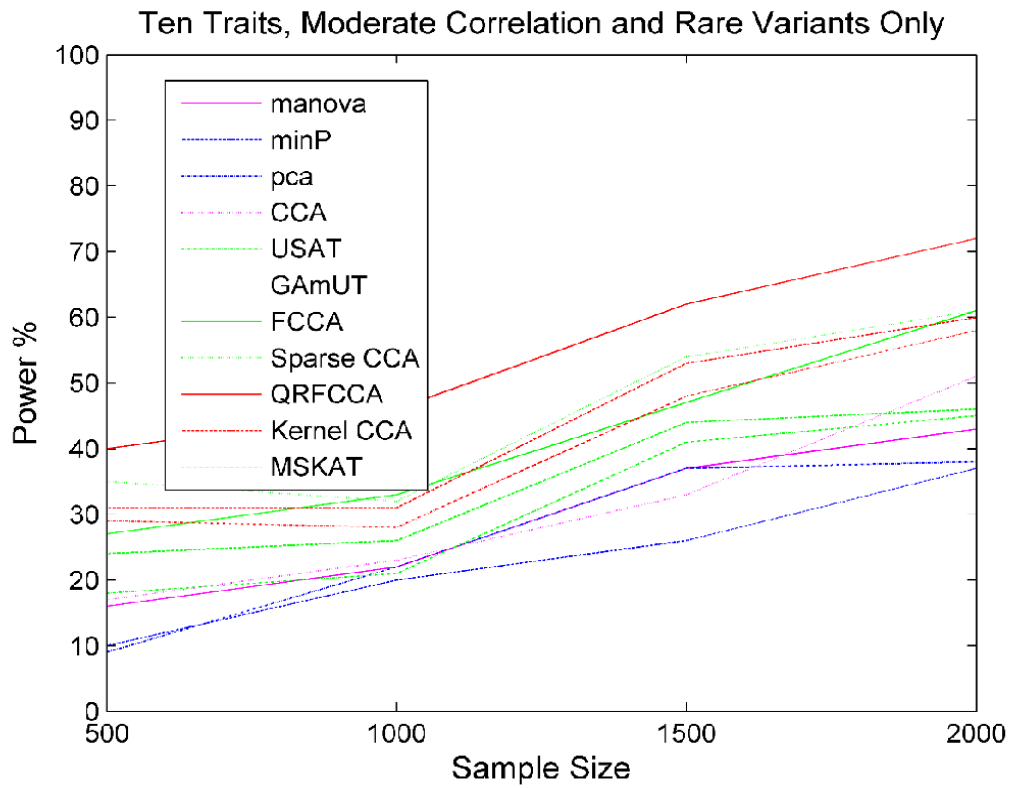

**Fig S9.** The power of curves as a function of sample sizes of 11 statistics for collectively testing the association of all rare variants in the gene with 15 traits with moderate correlations for the scenario 2 at the significance level  $\alpha = 0.05$ .

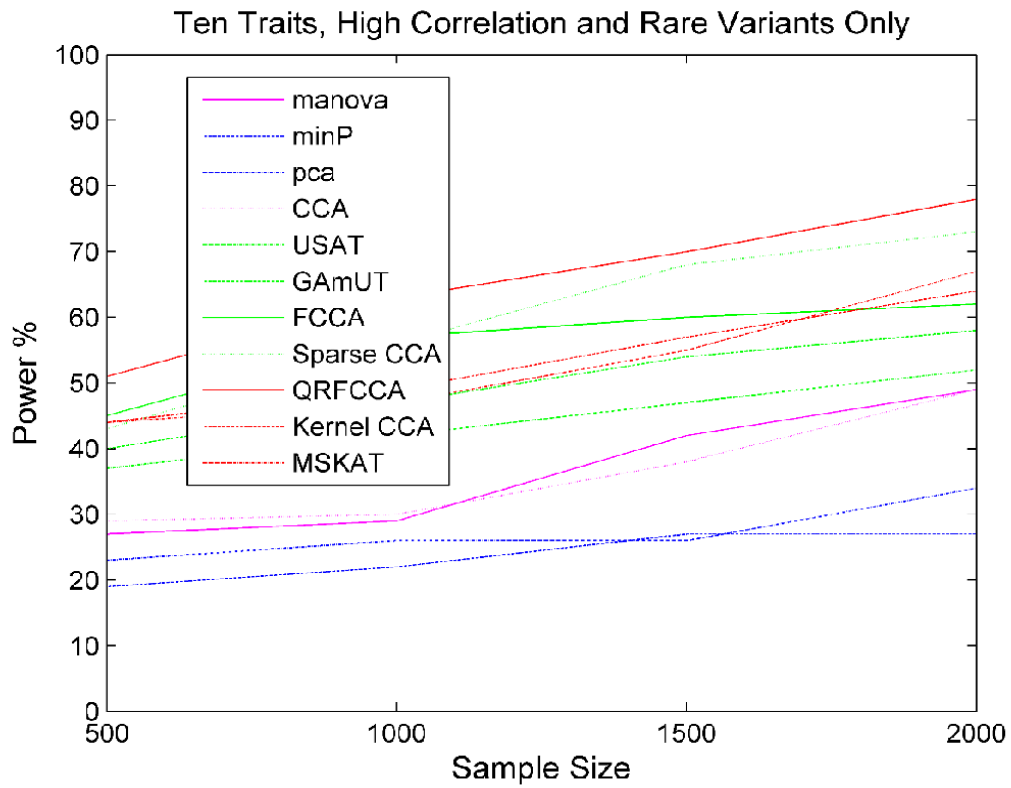

**Fig S10.** The power of curves as a function of sample sizes of 11 statistics for collectively testing the association of all rare variants in the gene with 15 traits with high correlations for the scenario 2 at the significance level  $\alpha = 0.05$ .

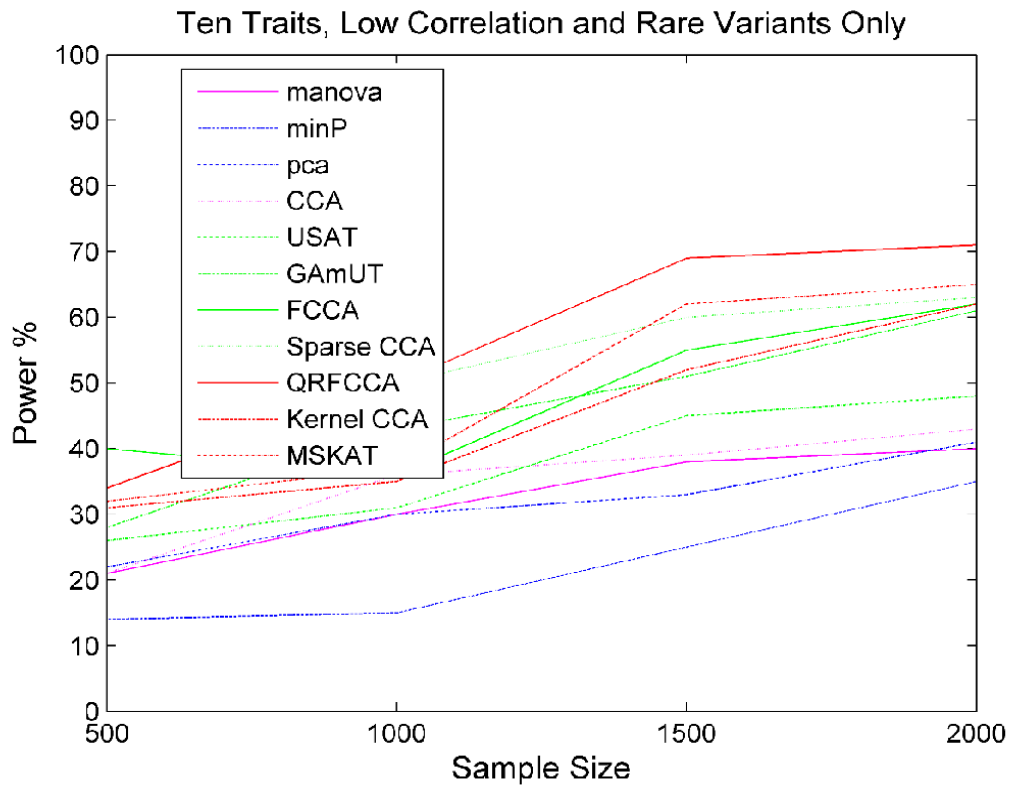

**Fig S11.** The power of curves as a function of sample sizes of 11 statistics for collectively testing the association of all rare variants in the gene with 10 traits with low correlations for the scenario 3 at the significance level  $\alpha = 0.05$ .

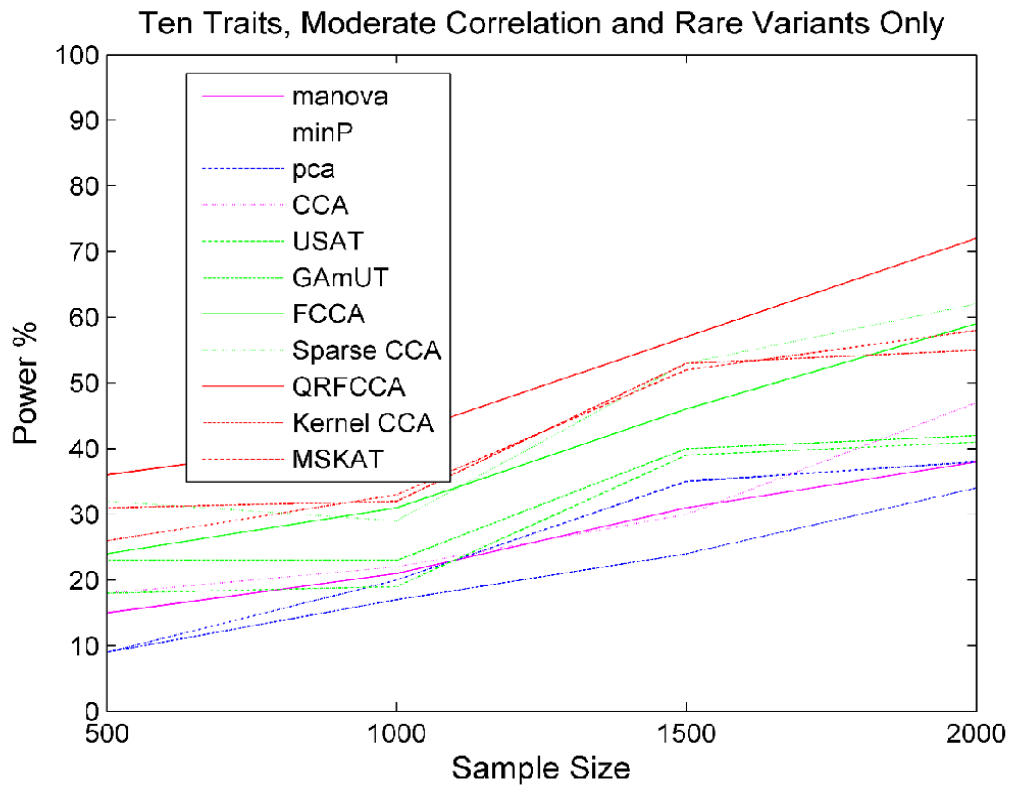

**Fig S12.** The power of curves as a function of sample sizes of 11 statistics for collectively testing the association of all rare variants in the gene with 10 traits with moderate correlations for the scenario 3 at the significance level  $\alpha = 0.05$ .

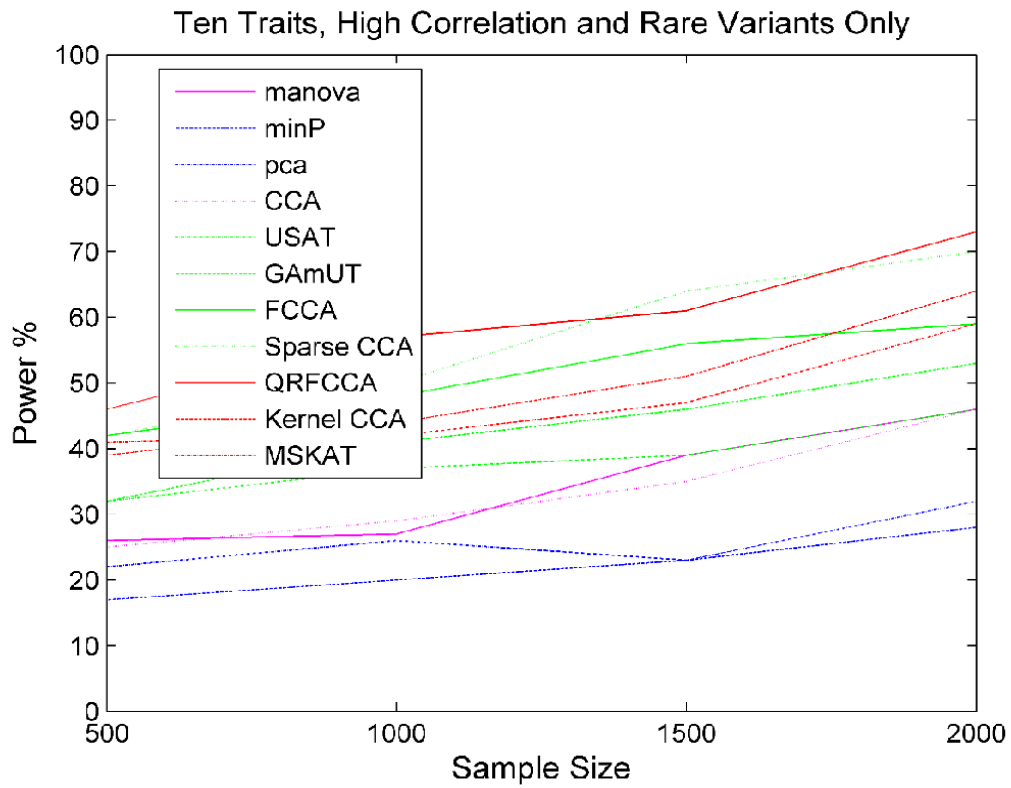

**Fig S13.** The power of curves as a function of sample sizes of 11 statistics for collectively testing the association of all rare variants in the gene with 10 traits with high correlations for the scenario 3 at the significance level  $\alpha = 0.05$ .

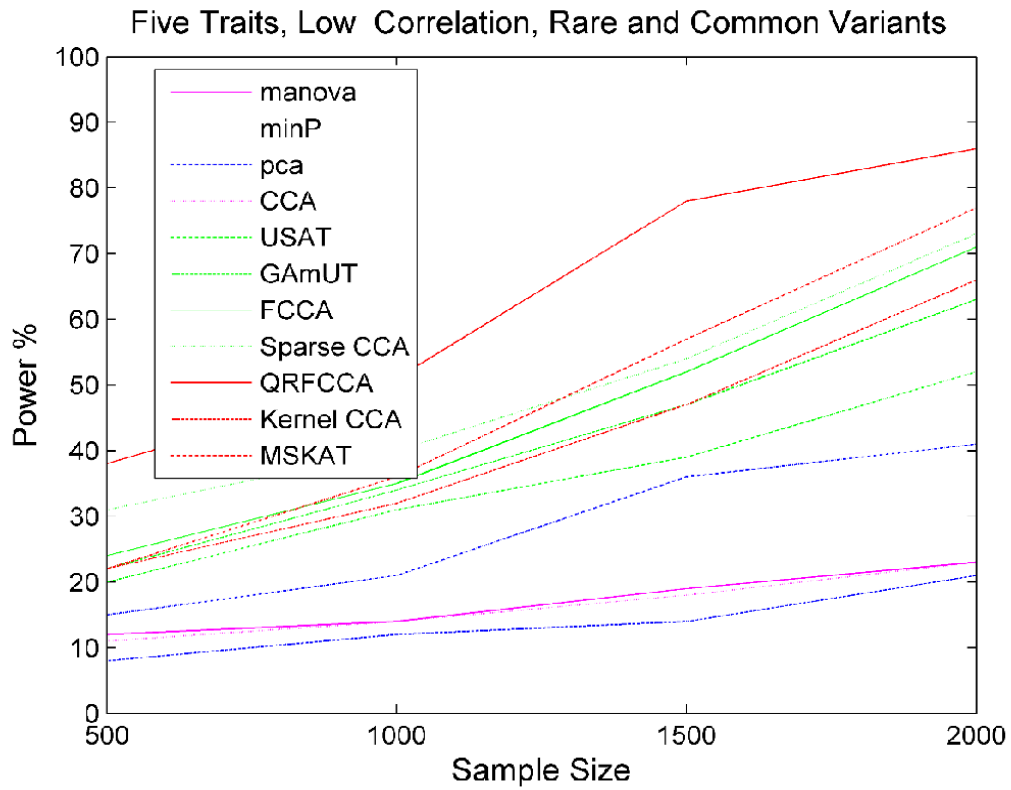

**Fig S14.** The power of curves as a function of sample sizes of 11 statistics for collectively testing the association of the gene including both rare and common variants with 5 traits with low correlations for the scenario 1 at the significance level  $\alpha = 0.05$ .

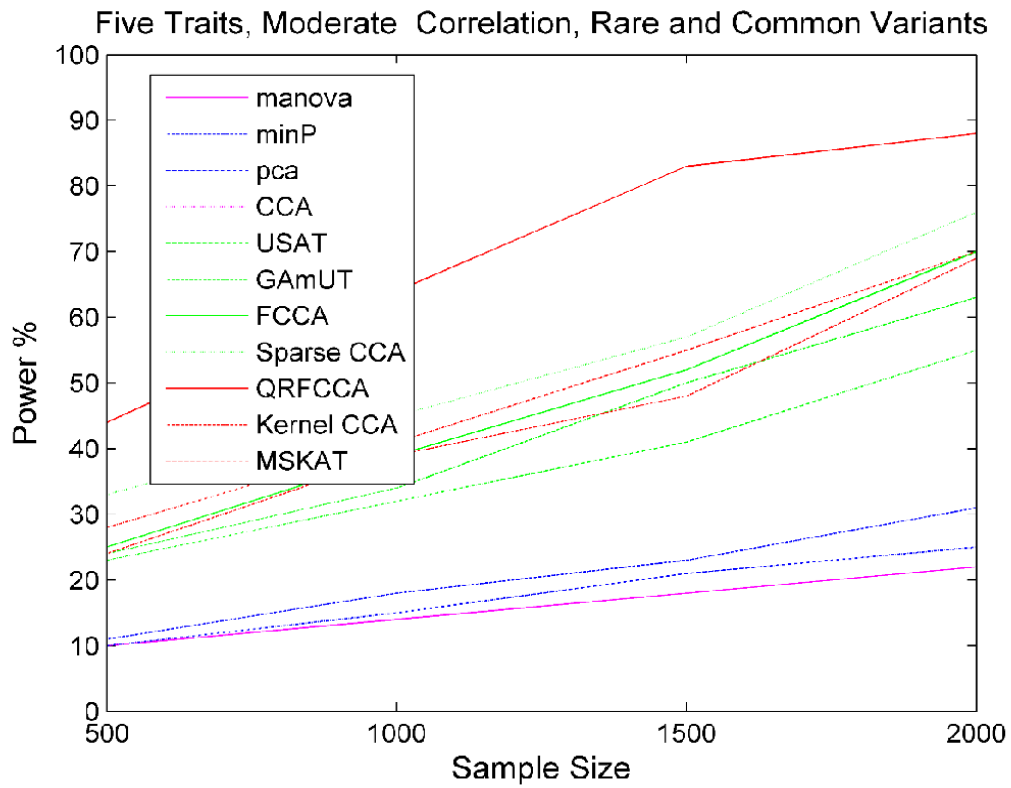

**Fig S15.** The power of curves as a function of sample sizes of 11 statistics for collectively testing the association of the gene including both rare and common variants with 5 traits with moderate correlations for the scenario 1 at the significance level  $\alpha = 0.05$  .

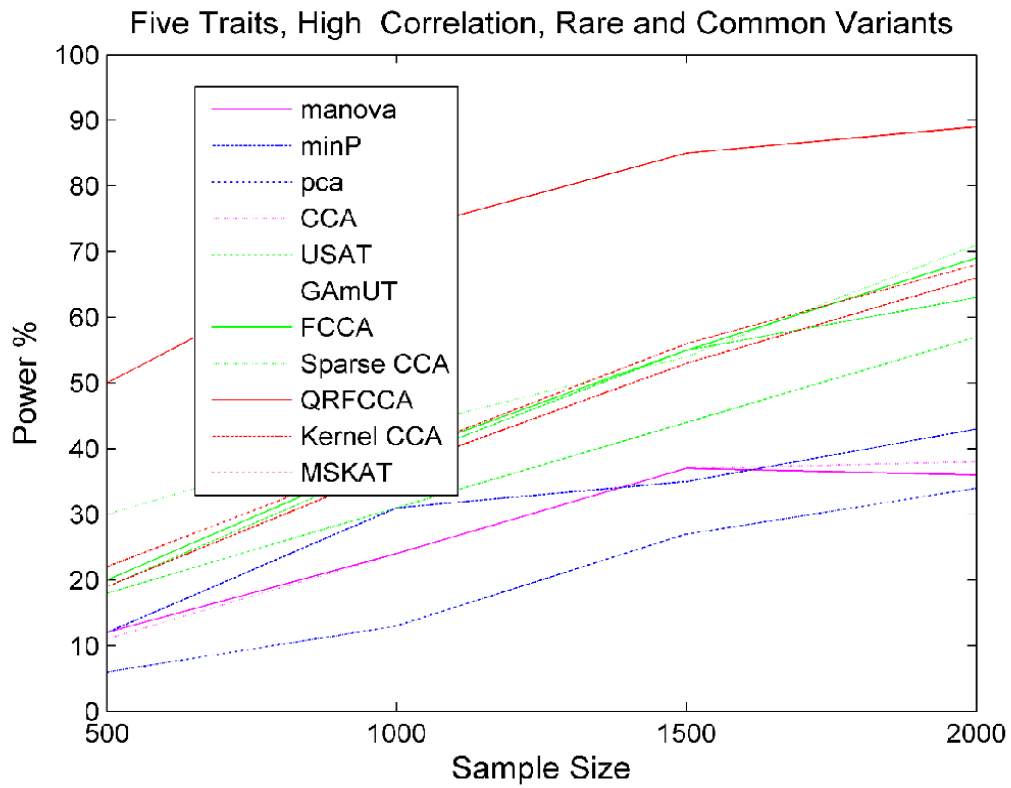

**Fig S16.** The power of curves as a function of sample sizes of 11 statistics for collectively testing the association of the gene including both rare and common variants with 5 traits with high correlations for the scenario 1 at the significance level  $\alpha = 0.05$  .



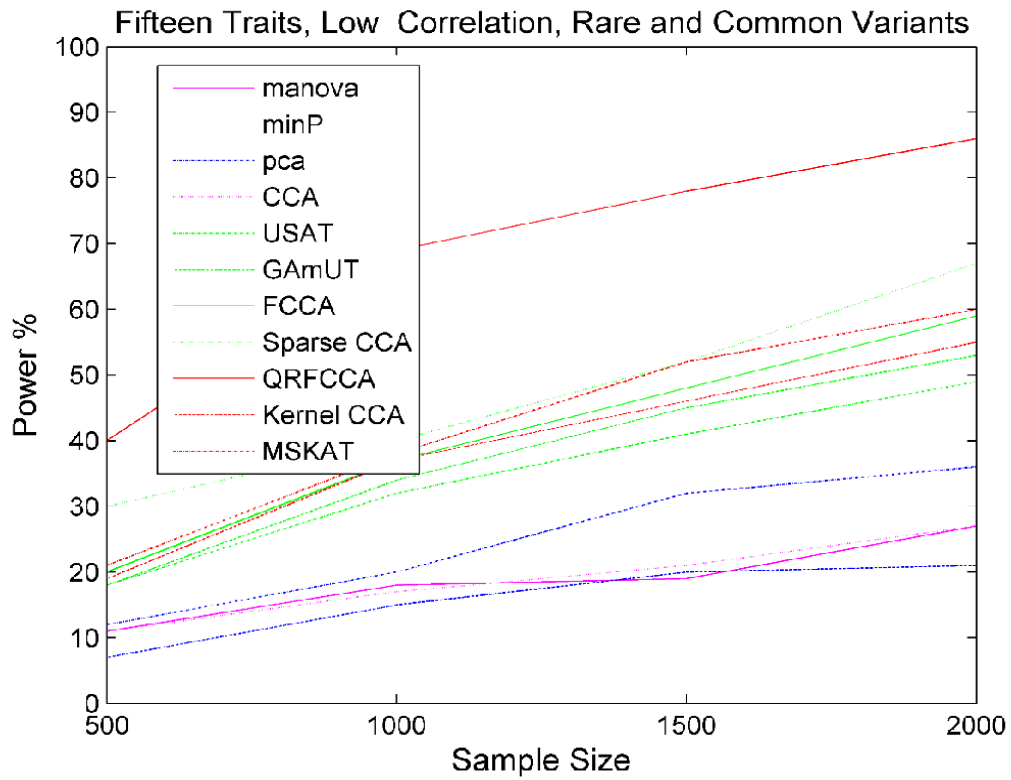

**Fig S17.** The power of curves as a function of sample sizes of 11 statistics for collectively testing the association of the gene including both rare and common variants with 15 traits with low correlations for the scenario 1 at the significance level  $\alpha = 0.05$ .

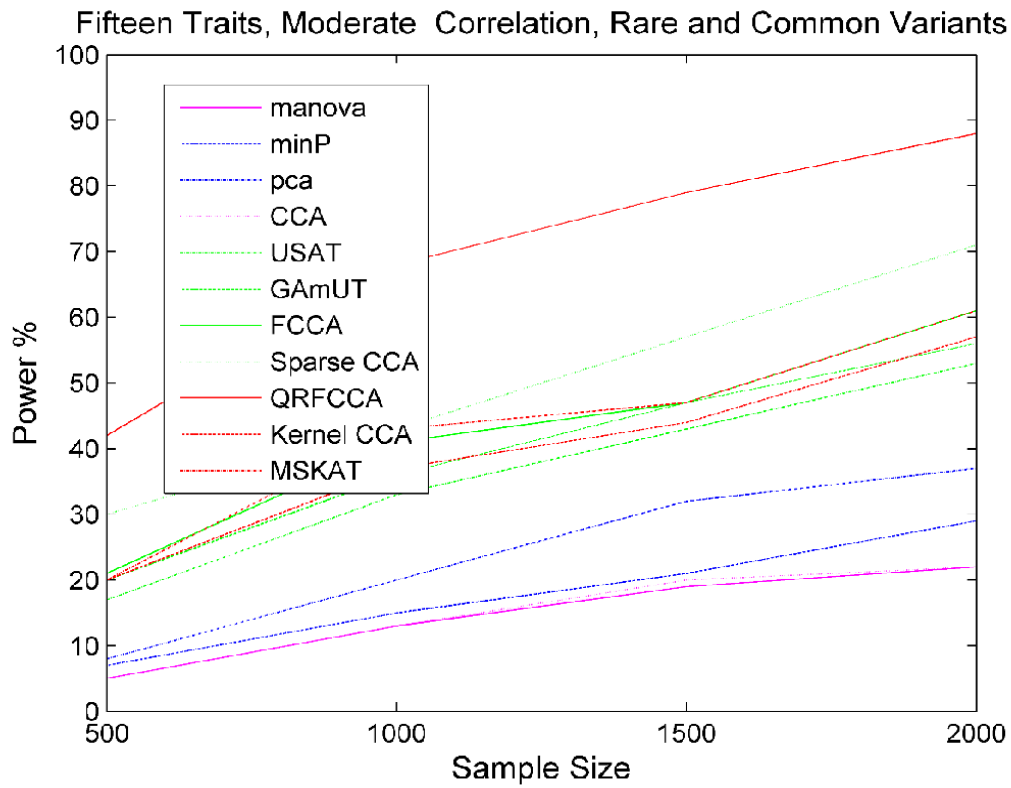

**Fig S18.** The power of curves as a function of sample sizes of 11 statistics for collectively testing the association of the gene including both rare and common variants with 15 traits with moderate correlations for the scenario 1 at the significance level  $\alpha = 0.05$  .

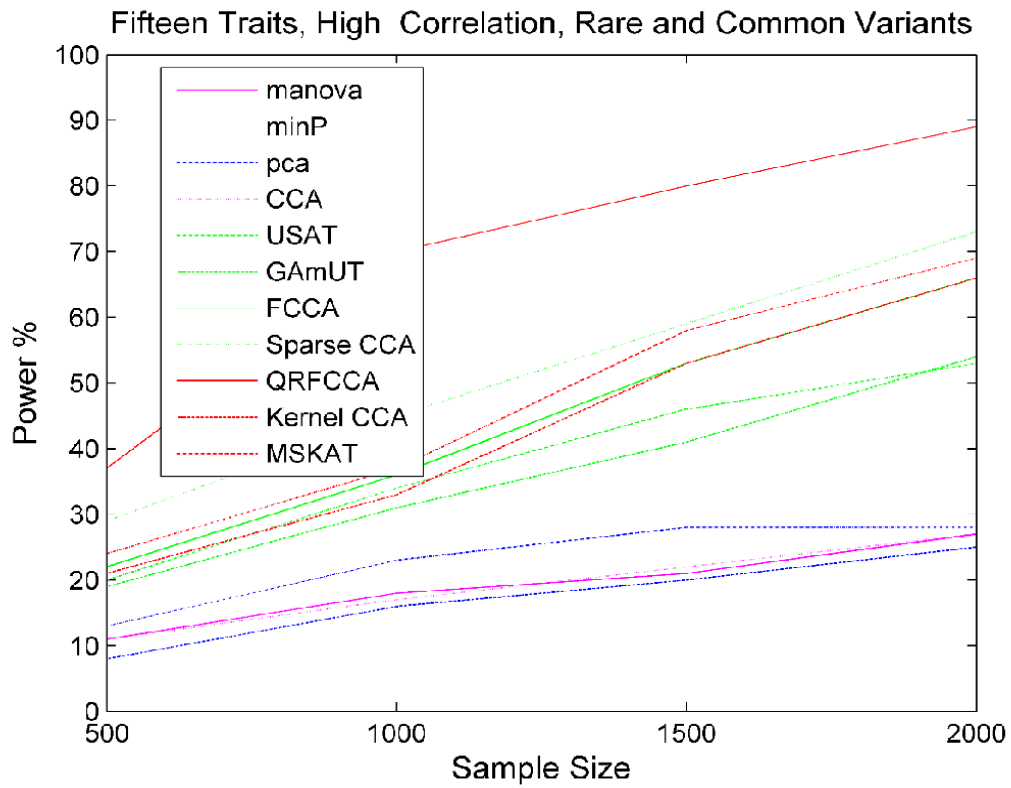

**Fig S19.** The power of curves as a function of sample sizes of 11 statistics for collectively testing the association of the gene including both rare and common variants with 15 traits with high correlations for the scenario 1 at the significance level  $\alpha = 0.05$  .

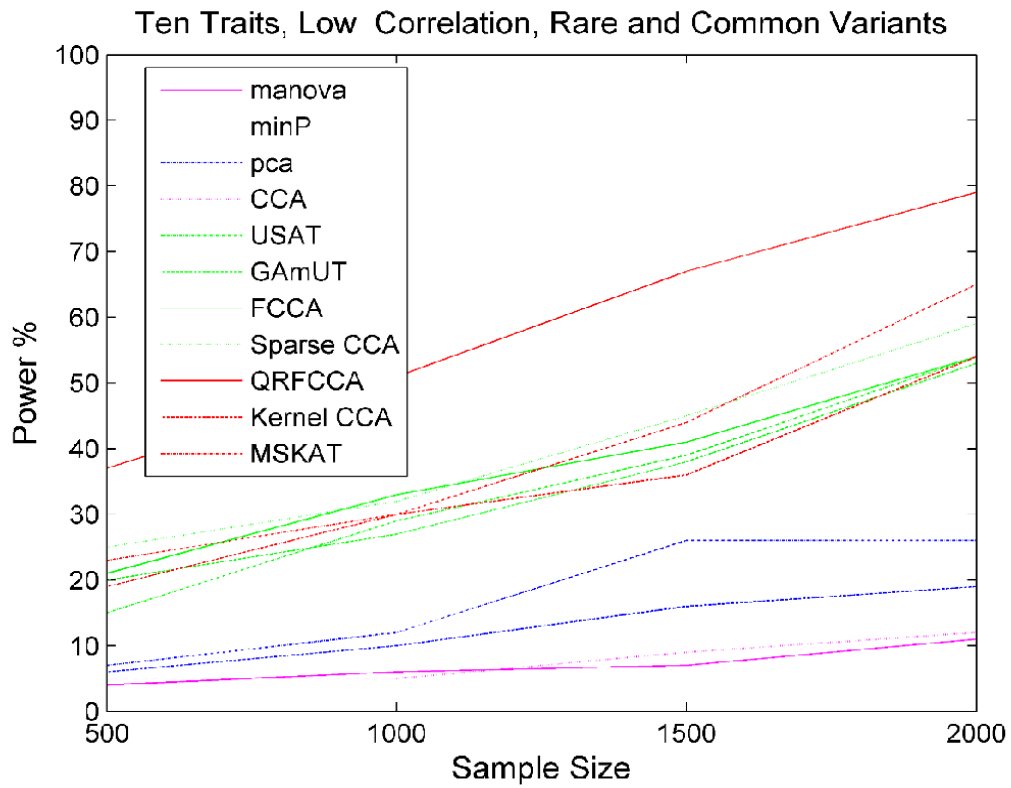

**Fig S20.** The power of curves as a function of sample sizes of 11 statistics for collectively testing the association of the gene including both rare and common variants with 10 traits with low correlations for the scenario 2 at the significance level  $\alpha = 0.05$ .

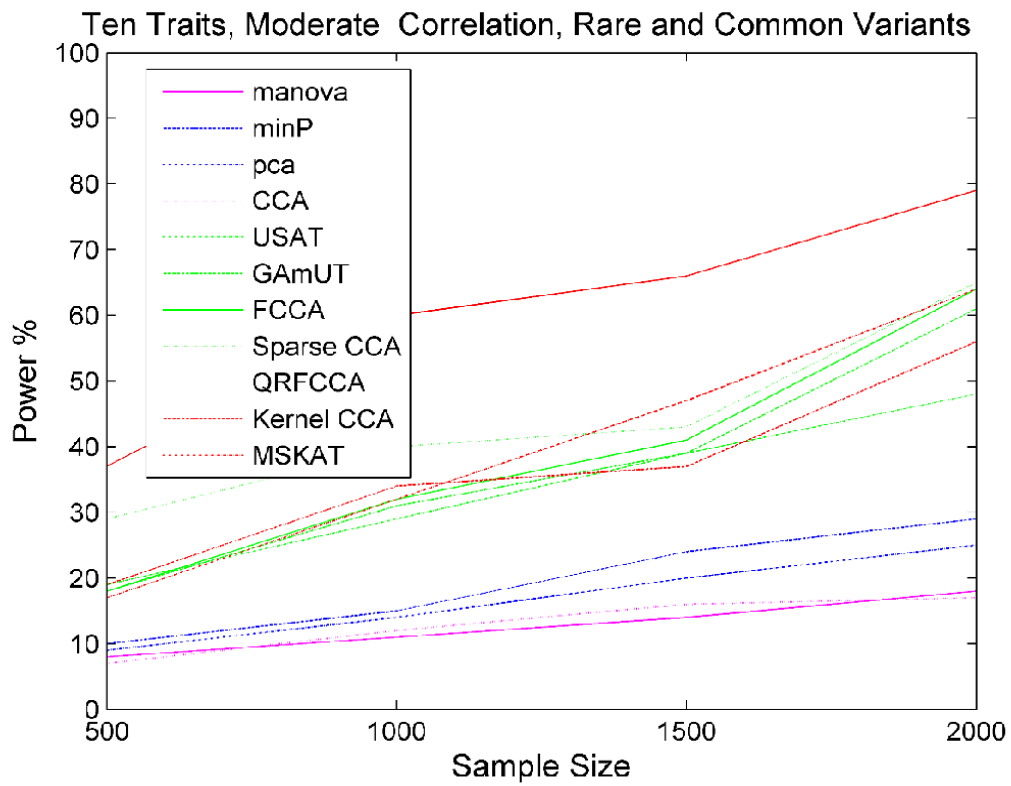

**Fig S21.** The power of curves as a function of sample sizes of 11 statistics for collectively testing the association of the gene including both rare and common variants with 10 traits with moderate correlations for the scenario 2 at the significance level  $\alpha = 0.05$ .

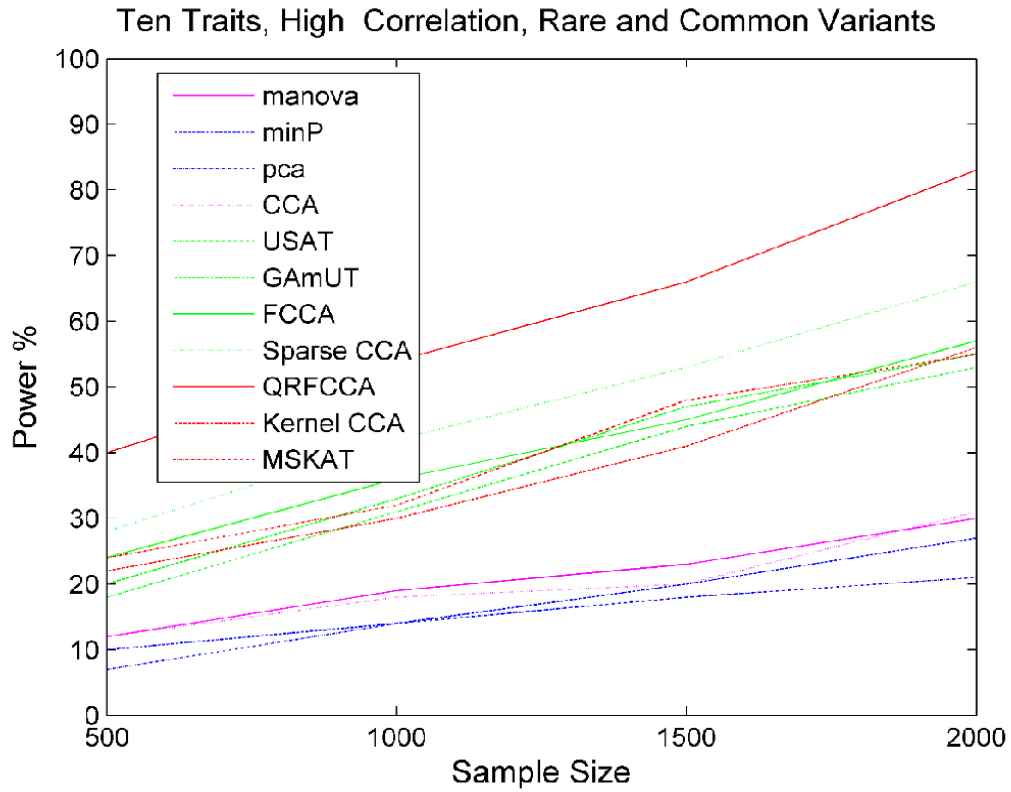

**Fig S22.** The power of curves as a function of sample sizes of 11 statistics for collectively testing the association of the gene including both rare and common variants with 10 traits with high correlations for the scenario 2 at the significance level  $\alpha = 0.05$ .

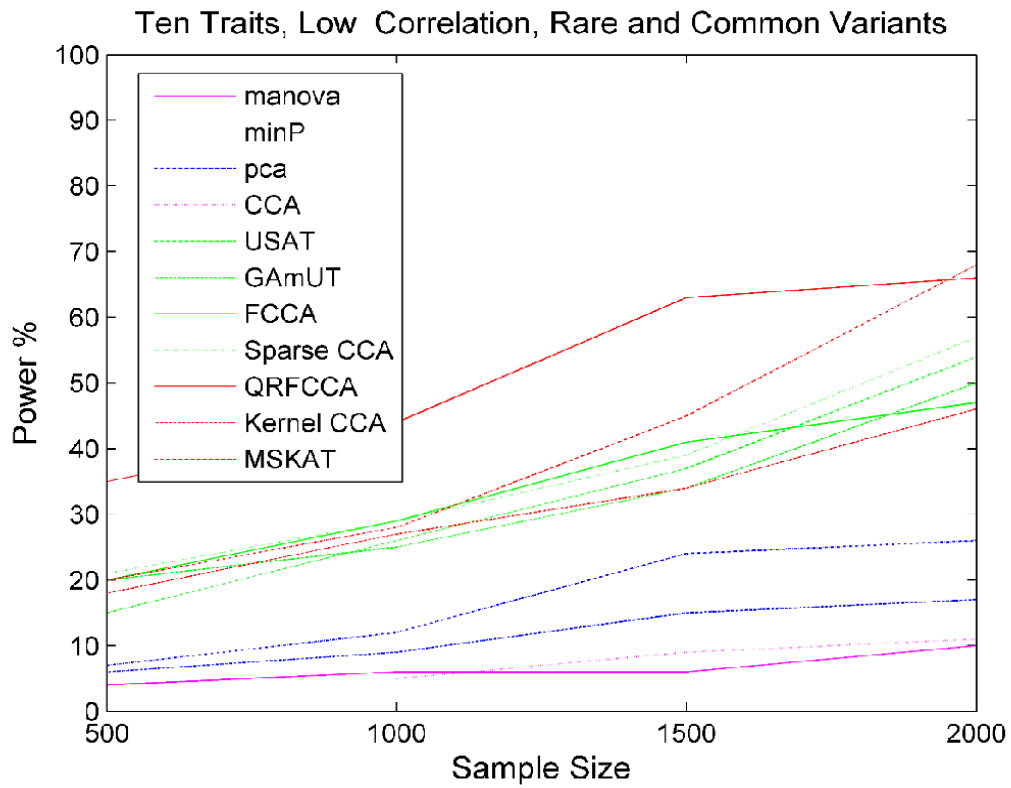

**Fig S23.** The power of curves as a function of sample sizes of 11 statistics for collectively testing the association of the gene including both rare and common variants with 10 traits with low correlations for the scenario 3 at the significance level  $\alpha = 0.05$ .

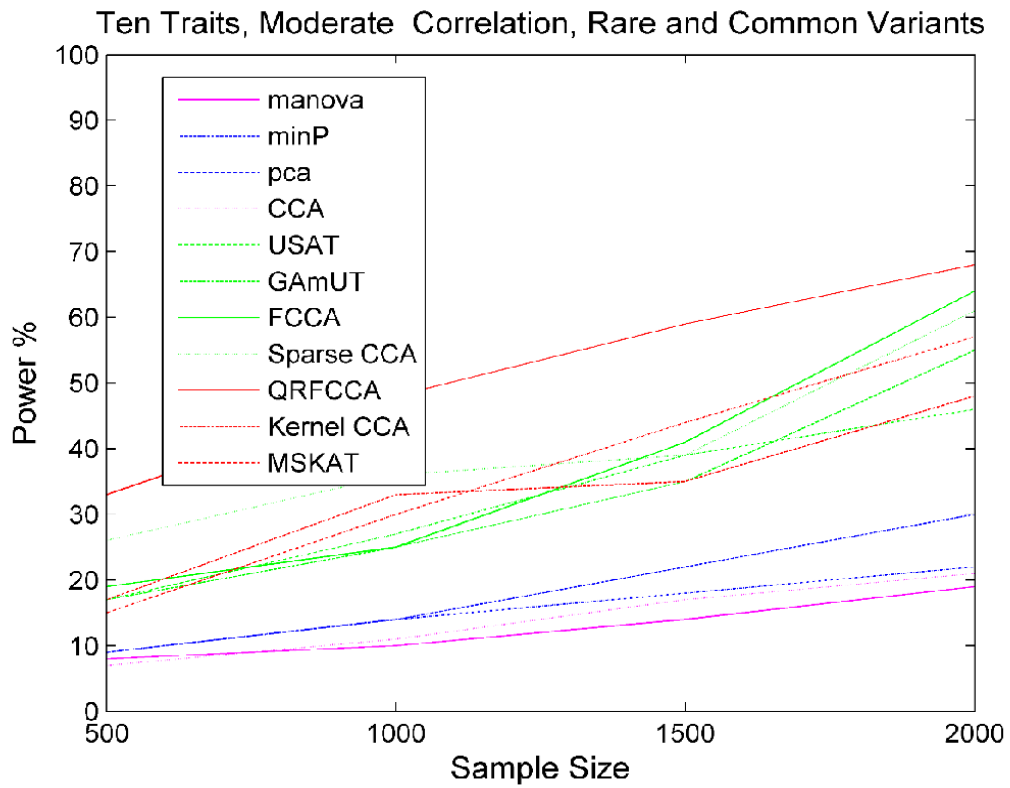

**Fig S24.** The power of curves as a function of sample sizes of 11 statistics for collectively testing the association of the gene including both rare and common variants with 10 traits with moderate correlations for the scenario 3 at the significance level  $\alpha = 0.05$ .



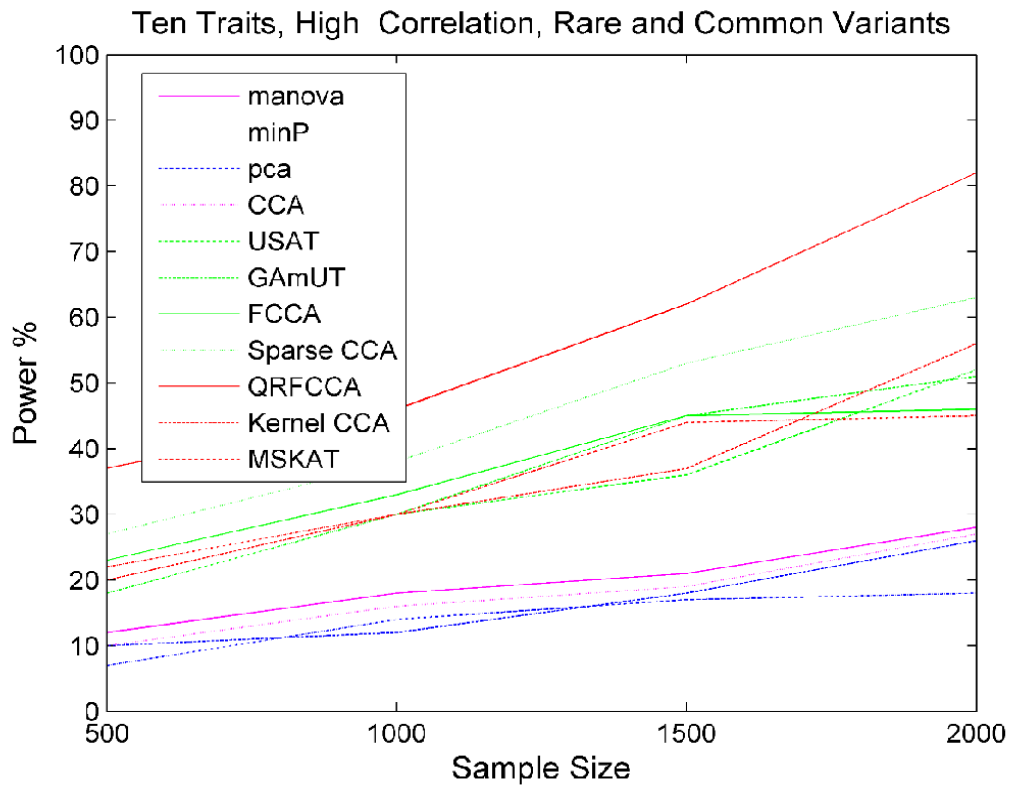

**Fig S25.** The power of curves as a function of sample sizes of 11 statistics for collectively testing the association of the gene including both rare and common variants with 10 traits with high correlations for the scenario 3 at the significance level  $\alpha = 0.05$ .

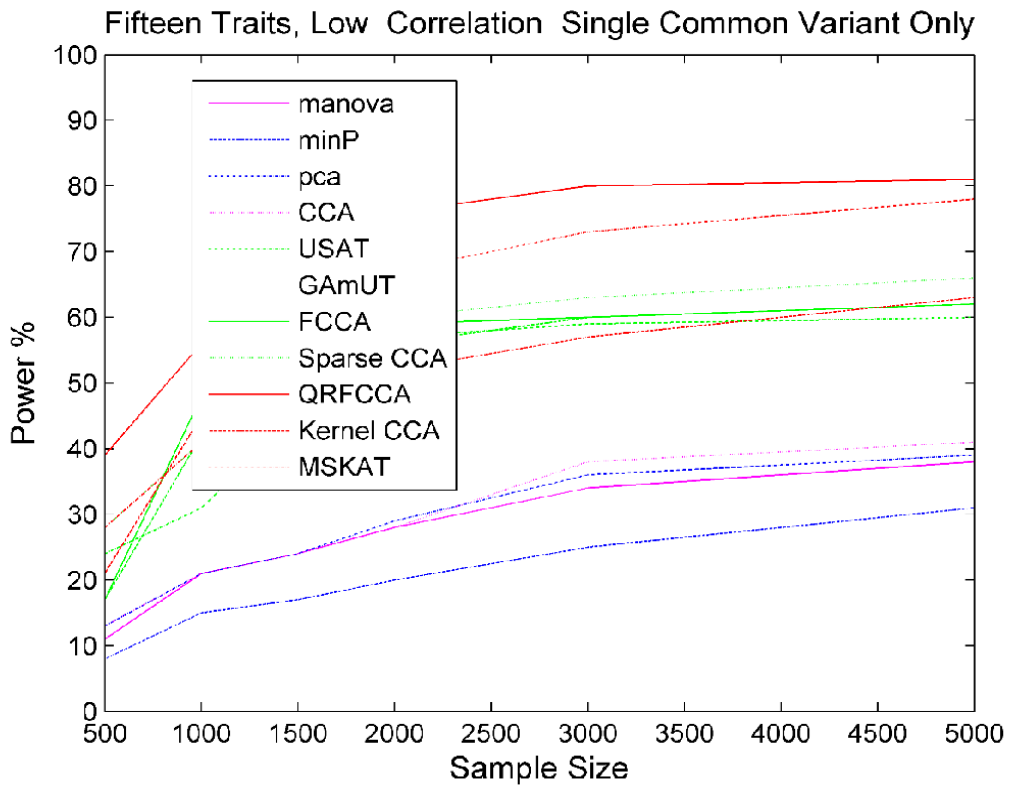

**Fig S26.** The power of curves as a function of sample sizes of 11 statistics for testing the power of a single common variant with 15 low correlated traits at the significance level  $\alpha = 0.05$ .

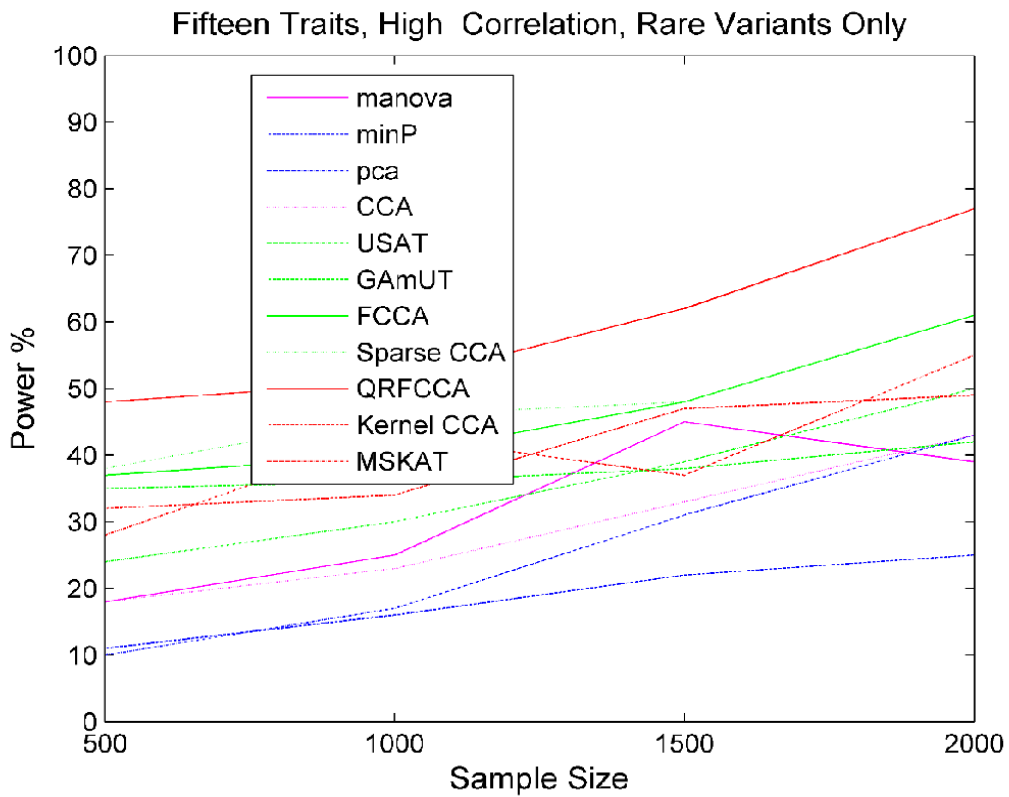

**Fig S27.** The power of curves as a function of sample sizes of 11 statistics for collectively testing the association of the gene including rare variants only with 15 highly correlated traits in scenario 1 at the significance level  $\alpha = 0.00001$ .

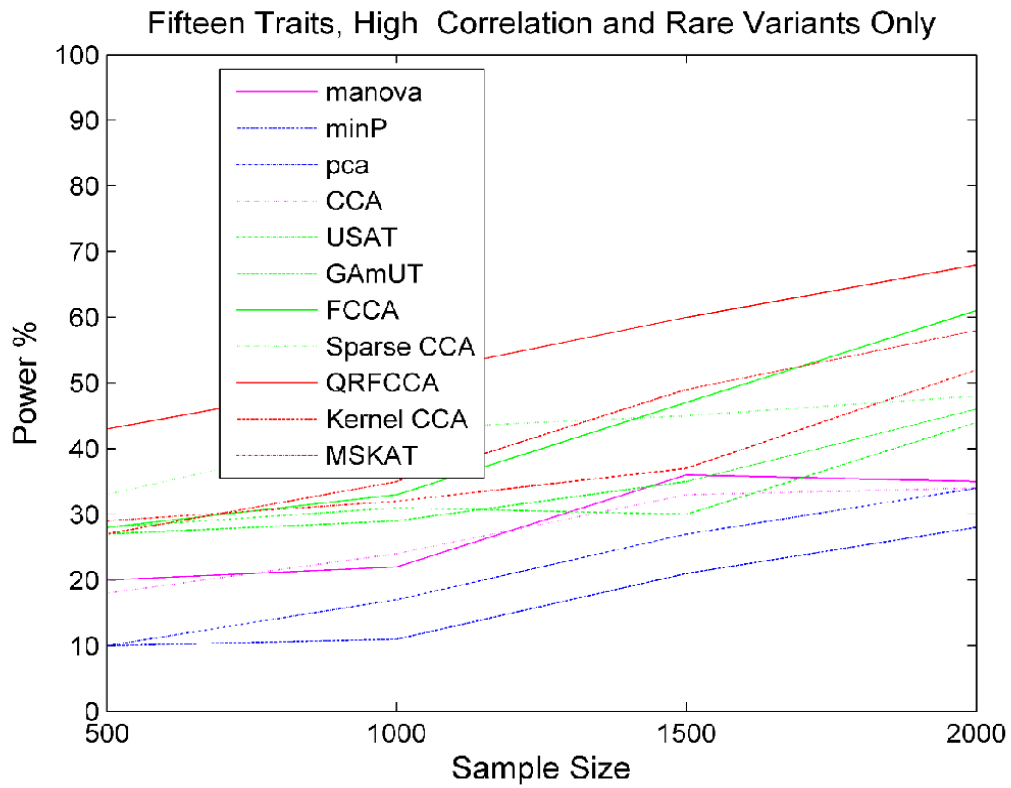

**Fig S28.** The power of curves as a function of sample sizes of 11 statistics for collectively testing the association of the gene including rare variants only with 15 highly correlated traits in scenario 2 at the significance level  $\alpha = 0.00001$ .

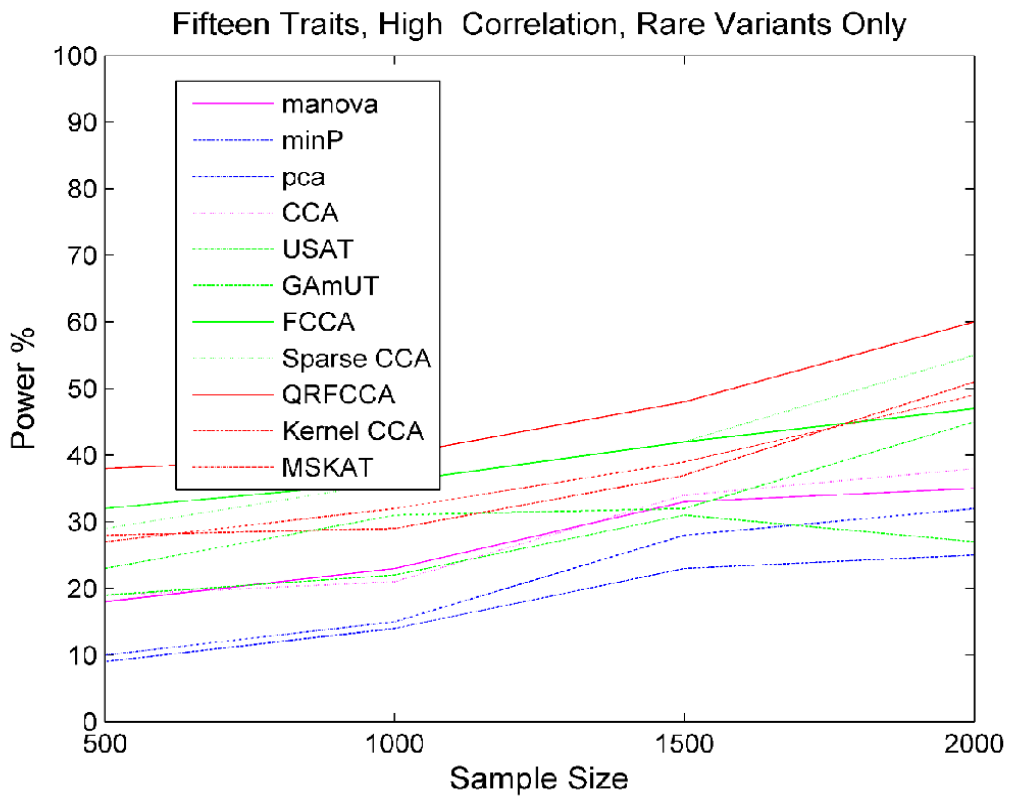

**Fig S29.** The power of curves as a function of sample sizes of 11 statistics for collectively testing the association of the gene including rare variants only with 15 highly correlated traits in scenario 3 at the significance level  $\alpha = 0.00001$ .



**Fig S30.** The power of curves as a function of sample sizes of 11 statistics for collectively testing the association of the gene including both rare and common variants with 15 highly correlated traits in scenario 1 at the significance level  $\alpha = 0.00001$ .

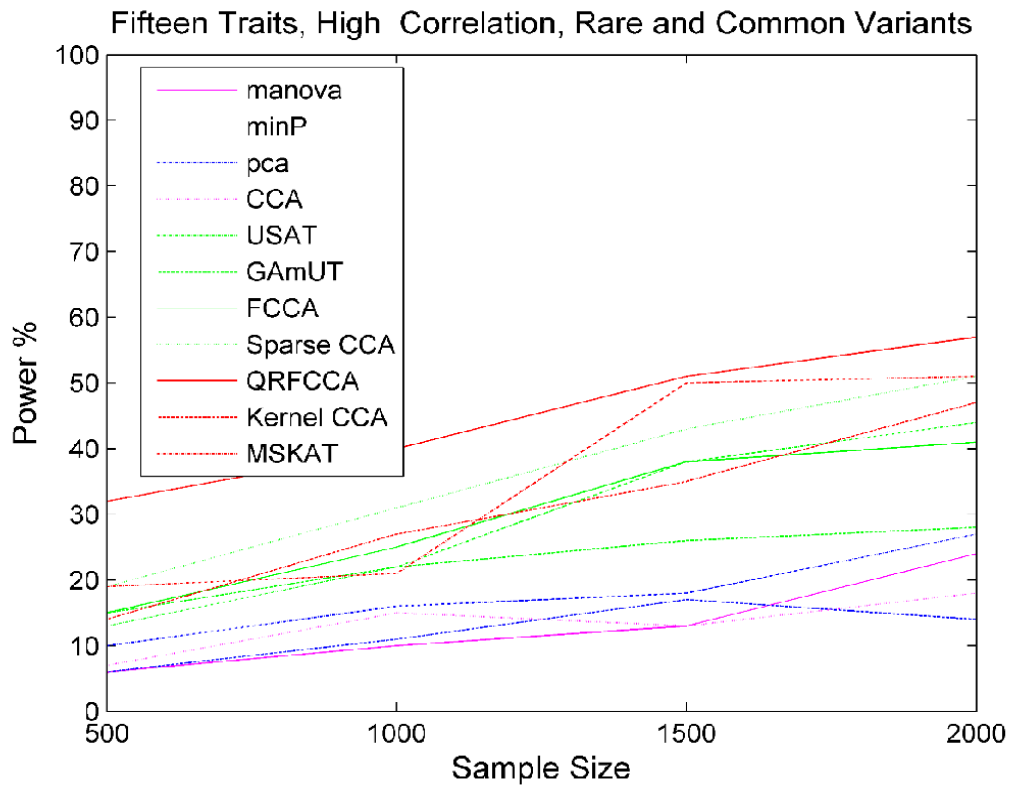

**Fig S31.** The power of curves as a function of sample sizes of 11 statistics for collectively testing the association of the gene including both rare and common variants with 15 highly correlated traits in scenario 2 at the significance level  $\alpha = 0.00001$ .

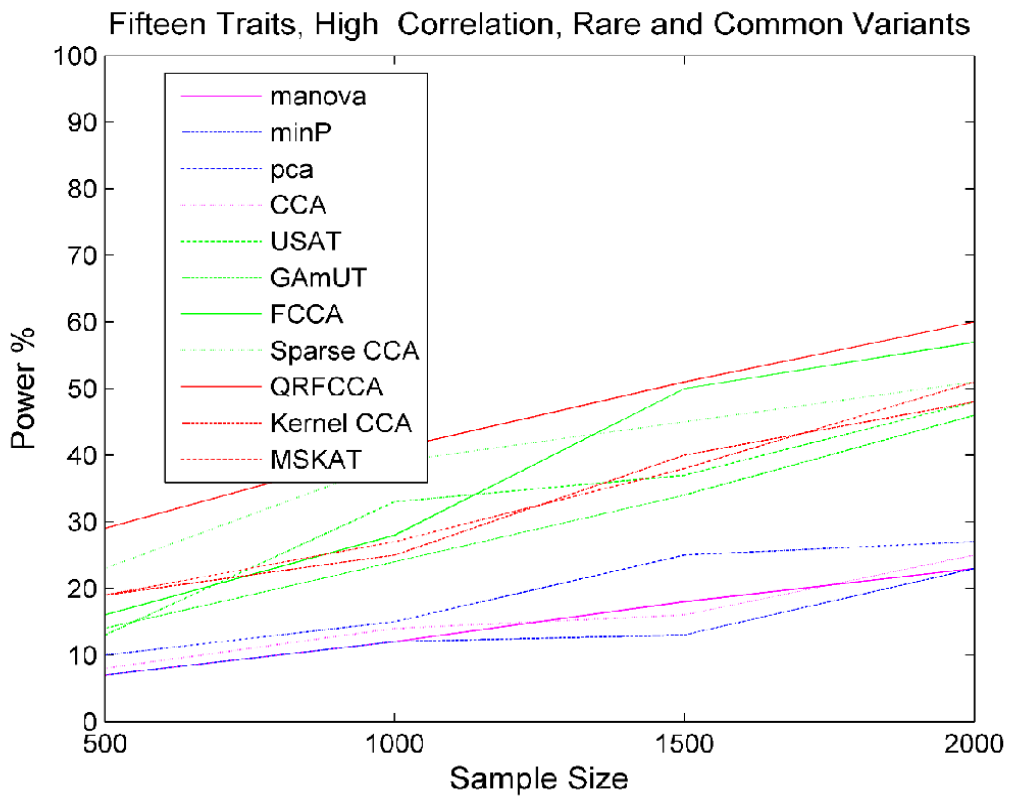

**Fig S32.** The power of curves as a function of sample sizes of 11 statistics for collectively testing the association of the gene including both rare and common variants with 15 highly correlated traits in scenario 3 at the significance level  $\alpha = 0.00001$ .



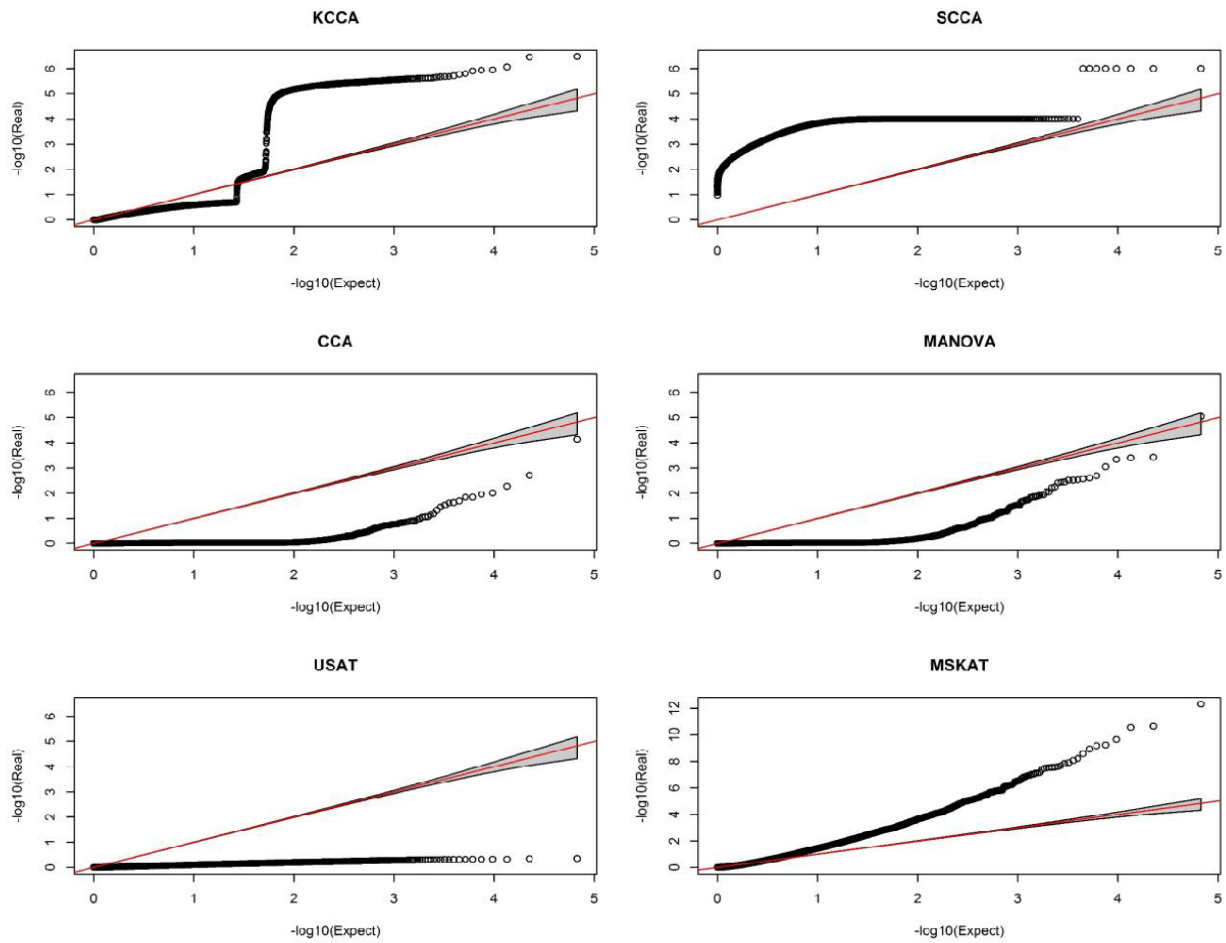

**Fig S33.** QQ plot of MSKAT, KCCA, CCA, USAT, SCCA, and MANOVA with 95% confidence interval for rare variants. The negative logarithm of the observed ( $y$  axis) and the expected ( $x$  axis) P value is plotted for each gene (dot), and the red line indicates the null hypothesis of no true association.

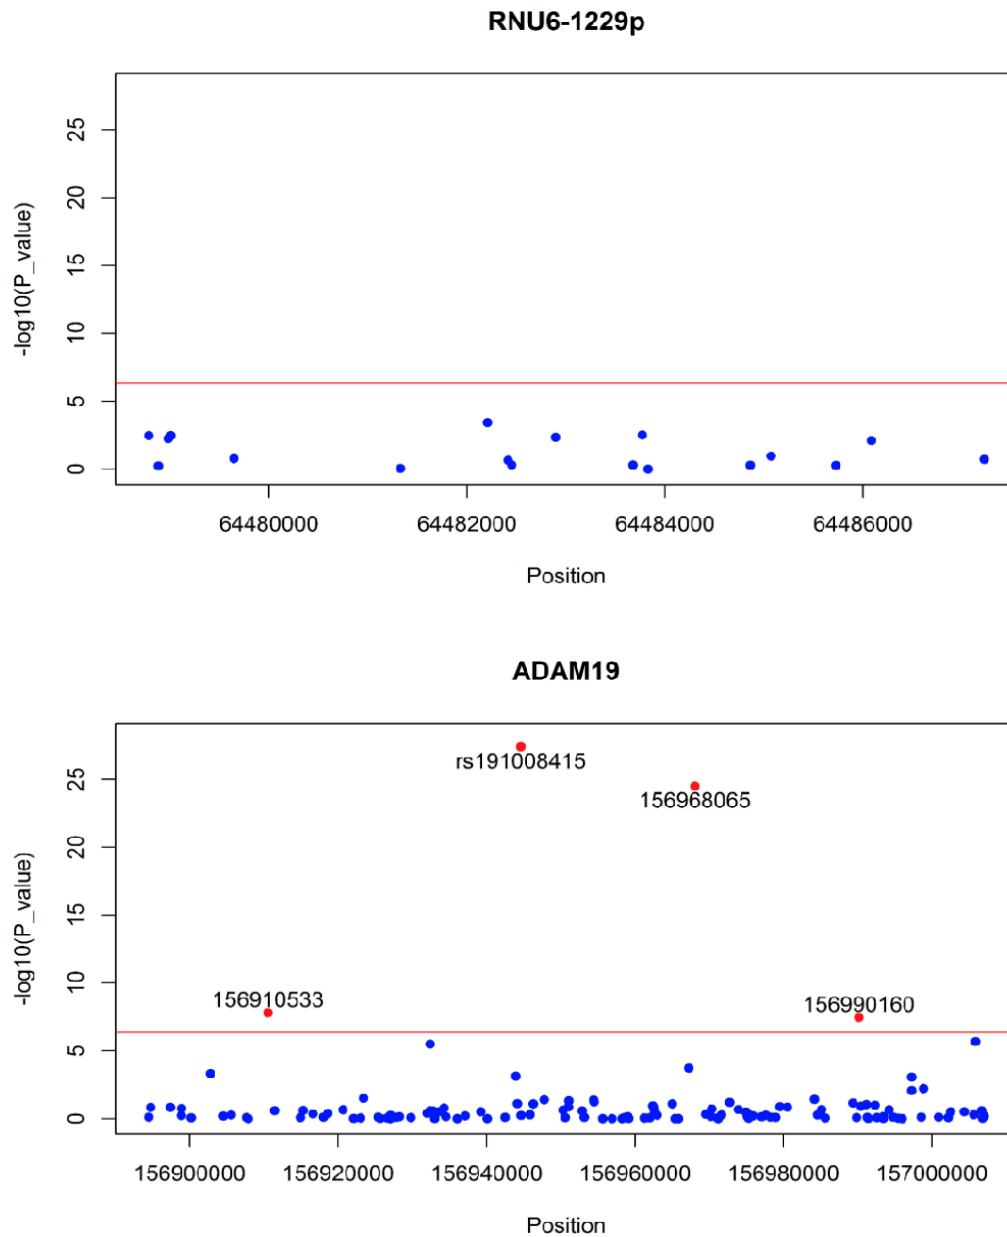

**Fig S34.** Association signals of SNPs within genes *RNU6-1229P* and *ADAM19*. In the top plot, we showed the P-values of the SNPs within *RNU6-1229P* associated with 46 traits. In the bottom plot, we showed the P-values of the SNPs within *ADAM19* associated with 46 traits where the numbers next to the red points were the RS number or genomic position of the SNPs.

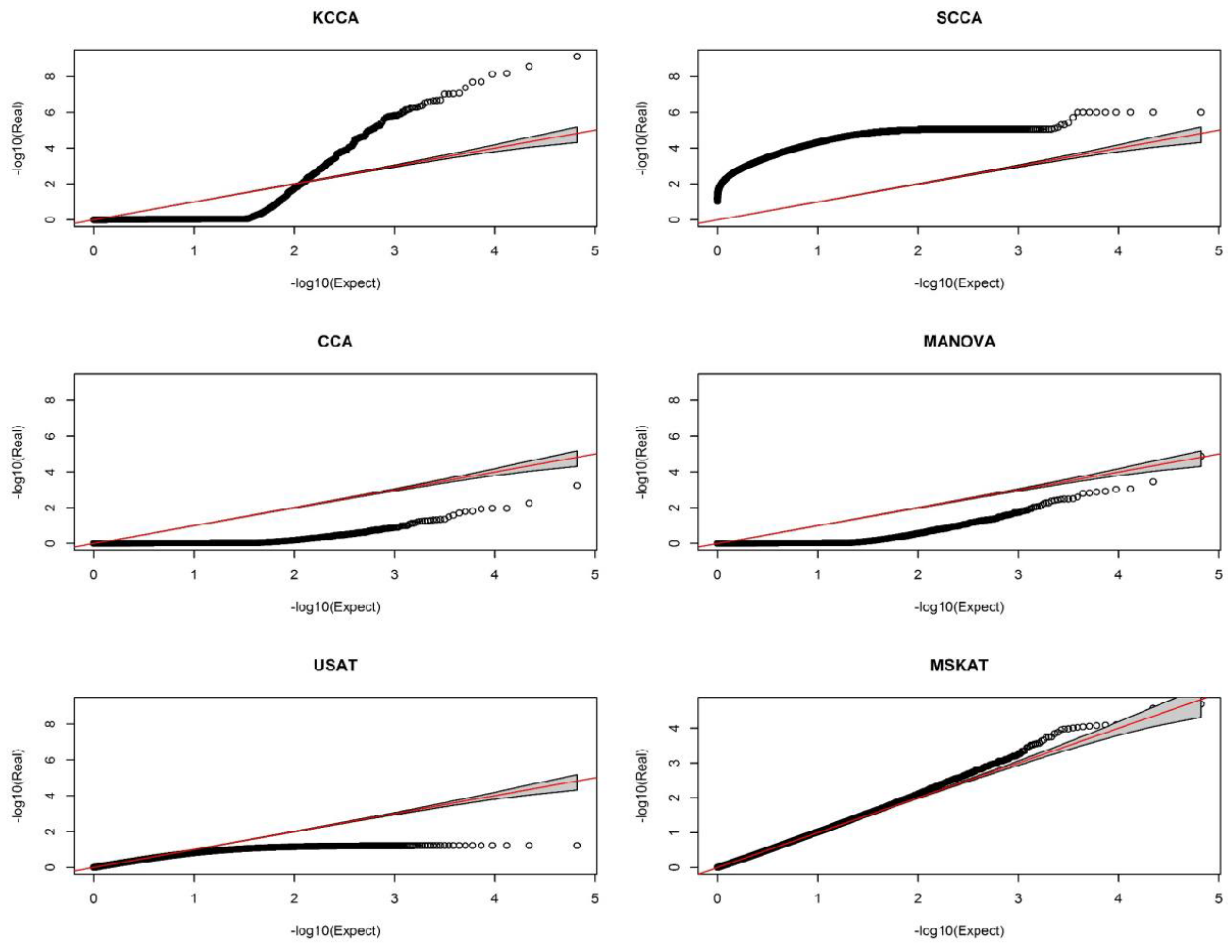

**Fig S35.** QQ plot of KCCA, CCA, USAT, SCCA, and MANOVA with 95% confidence interval for common variants. The negative logarithm of the observed ( $y$  axis) and the expected ( $x$  axis) P value is plotted for each gene (dot), and the red line indicates the null hypothesis of no true association.

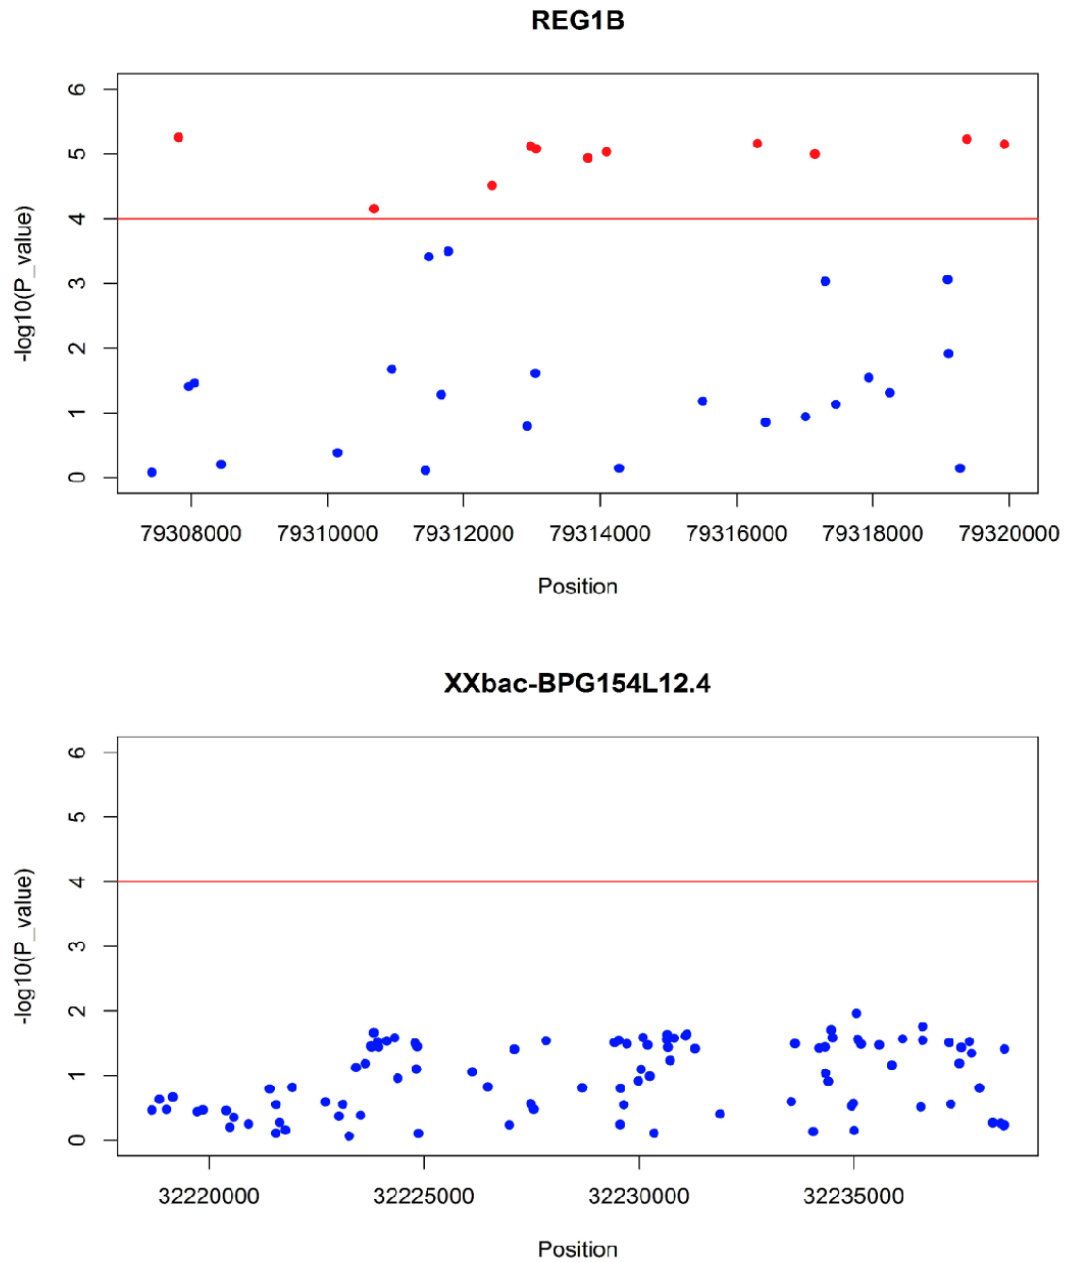

**Fig S36.** Association signals of SNPs within genes *REG1B* and *XXbac-BPG154L12.4*. In the top plot, we showed the P-values of the SNPs within *REG1B* associated with the 46 traits. In the bottom plot, we showed the P-values of the SNPs within *XXbac-BPG154L12.4* associated with the 46 traits where the numbers next to the red points were the RS number or genomic position of the SNPs.
