# Supplementary material for: A quadratically regularized functional canonical correlation analysis for identifying the global structure of pleiotropy with NGS data
Source: PubMed Central journal article supplement (PMC5659802; doi:10.1371/journal.pcbi.1005788), 2017-10-17
Supplement: pcbi.1005788.s003.pdf [file pcbi.1005788.s003.pdf]

Table S17. A list of the 46 traits in 13 major phenotype groups.

|                   |                                                                          |
|-------------------|--------------------------------------------------------------------------|
| Blood             | Hgb<br>MCV<br>PCV<br>PLT<br>RBC<br>WBC<br>MCH                            |
| Homocysteine      | Homocysteine                                                             |
| Glycaemia         | Glucose<br>Insulin                                                       |
| Insulin resistant | HOMA_b<br>HOMA_ir                                                        |
| Lipid             | TotalCholesterol<br>HDL<br>LDL<br>VLDL<br>ApoA1<br>ApoB<br>Triglycerides |
| Inflammatory      | HsCRP                                                                    |
| Kidney            | Uric_Acid<br>Bicarbonate<br>Creatinine<br>Phosphate<br>Sodium<br>Urea    |
| Liver             | Albumin<br>Alkaline<br>Bilirubin<br>GGT                                  |
| Body              | Height<br>Weight<br>BMI<br>Waist<br>Hip<br>WHR                           |
| Electrical        | ECG HeartRate<br>RR Interval                                             |

|          |                                   |
|----------|-----------------------------------|
|          | QT Interval                       |
| BP       | Systolic BP<br>Diastolic BP       |
| Lung     | FVC<br>FEV1<br>FEV1.FVC Ratio     |
| Extended | Total Fat Mass<br>Total Lean Mass |

Table S18. A list of P-values of 54 genes significantly associated with 46 traits us

| Gene          | Statistical Methods |         |         |         |         |         |         |
|---------------|---------------------|---------|---------|---------|---------|---------|---------|
|               | QRFCCA              | FCCA    | GAMuT   | SCCA    | USAT    | MANOVA  | CCA     |
| VILL          | 1.7E-08             | 2.4E-07 | 3.0E-06 | 1.2E-04 | 9.1E-01 | 9.8E-01 | 9.5E-01 |
| KRT27         | 2.0E-08             | 3.6E-08 | 9.4E-02 | 2.3E-03 | 9.8E-01 | 9.7E-01 | 9.6E-01 |
| RNU6-1243P    | 2.3E-08             | 1.3E-07 | 1.4E-05 | 1.3E-04 | 8.1E-01 | 8.4E-01 | 9.1E-01 |
| RP11-6N17.10  | 2.5E-08             | 5.3E-08 | 8.5E-06 | 2.7E-04 | 8.0E-01 | 8.4E-01 | 9.3E-01 |
| AL358134.2    | 2.8E-08             | 1.1E-08 | 1.6E-02 | 8.1E-04 | 9.3E-01 | 9.1E-01 | 9.9E-01 |
| GAPDH         | 3.0E-08             | 6.5E-07 | 7.3E-04 | 1.1E-04 | 9.3E-01 | 8.1E-01 | 8.9E-01 |
| DERL1         | 3.5E-08             | 1.1E-06 | 8.0E-04 | 2.0E-04 | 9.9E-01 | 9.3E-01 | 9.4E-01 |
| RP1-102E24.9  | 4.3E-08             | 2.9E-06 | 3.1E-06 | 1.5E-04 | 8.6E-01 | 9.5E-01 | 9.7E-01 |
| PPBP          | 4.8E-08             | 2.8E-08 | 9.2E-06 | 7.0E-04 | 9.8E-01 | 9.4E-01 | 9.6E-01 |
| LINC00443     | 5.1E-08             | 6.1E-05 | 5.4E-06 | 2.3E-04 | 9.6E-01 | 9.6E-01 | 9.3E-01 |
| RP11-10O17.1  | 5.2E-08             | 1.2E-04 | 1.4E-01 | 2.7E-04 | 9.7E-01 | 9.5E-01 | 9.5E-01 |
| PROCA1        | 5.6E-08             | 4.2E-07 | 9.8E-04 | 5.9E-03 | 7.1E-01 | 6.7E-01 | 9.6E-01 |
| CHMP2B        | 6.0E-08             | 3.3E-08 | 5.1E-06 | 3.0E-04 | 8.2E-01 | 9.3E-01 | 9.2E-01 |
| IGKV2-4       | 6.3E-08             | 2.8E-07 | 5.9E-06 | 1.3E-04 | 9.9E-01 | 8.1E-01 | 9.1E-01 |
| AC017104.1    | 8.2E-08             | 1.2E-06 | 1.4E-03 | 2.2E-03 | 9.2E-01 | 8.3E-01 | 9.5E-01 |
| RNU6-980P     | 8.2E-08             | 2.7E-07 | 5.0E-04 | 3.2E-04 | 9.7E-01 | 7.0E-01 | 8.3E-01 |
| AC016691.2    | 8.9E-08             | 8.3E-07 | 5.5E-03 | 1.9E-04 | 9.3E-01 | 9.2E-01 | 9.9E-01 |
| RNA5SP19      | 9.0E-08             | 2.4E-07 | 1.1E-03 | 6.8E-04 | 9.9E-01 | 6.2E-01 | 9.6E-01 |
| snoU13        | 9.2E-08             | 9.8E-05 | 9.9E-06 | 1.3E-04 | 9.0E-01 | 9.1E-01 | 9.4E-01 |
| MLN           | 9.5E-08             | 6.6E-07 | 4.7E-06 | 1.1E-04 | 9.0E-01 | 9.4E-01 | 9.5E-01 |
| RP11-55L4.2   | 1.0E-07             | 8.9E-07 | 1.1E-03 | 6.3E-03 | 8.2E-01 | 3.6E-01 | 7.0E-01 |
| CTC-505O3.2   | 1.2E-07             | 4.0E-07 | 9.9E-03 | 2.3E-03 | 9.5E-01 | 9.3E-01 | 9.6E-01 |
| ISCA1P1       | 1.2E-07             | 2.2E-07 | 1.3E-03 | 1.3E-04 | 9.9E-01 | 9.4E-01 | 9.1E-01 |
| JUN           | 1.3E-07             | 8.7E-08 | 4.6E-02 | 1.0E-06 | 7.9E-01 | 9.9E-01 | 9.9E-01 |
| AC140061.12   | 1.4E-07             | 1.8E-07 | 8.0E-03 | 1.2E-04 | 8.3E-01 | 1.2E-02 | 1.1E-01 |
| RP11-697E2.10 | 1.8E-07             | 2.7E-07 | 5.4E-03 | 4.0E-04 | 6.2E-01 | 6.1E-01 | 8.5E-01 |
| RNU6-717P     | 1.9E-07             | 2.5E-07 | 9.1E-03 | 1.7E-03 | 9.8E-01 | 2.9E-01 | 5.8E-01 |
| RP11-98D18.17 | 2.4E-07             | 2.5E-07 | 1.1E-03 | 6.6E-03 | 9.2E-01 | 3.8E-01 | 6.8E-01 |
| PPIAP13       | 2.4E-07             | 2.3E-06 | 3.6E-02 | 2.4E-04 | 9.6E-01 | 9.5E-01 | 9.1E-01 |
| SETP2         | 2.7E-07             | 2.6E-06 | 2.7E-04 | 6.0E-04 | 8.0E-01 | 9.7E-01 | 9.4E-01 |
| AC008691.1    | 3.2E-07             | 7.4E-07 | 3.4E-04 | 1.1E-04 | 9.1E-01 | 9.2E-01 | 9.9E-01 |
| RP1-40E16.2   | 3.4E-07             | 5.7E-06 | 1.3E-04 | 1.8E-04 | 9.1E-01 | 7.9E-01 | 9.8E-01 |
| RP11-79P5.9   | 3.5E-07             | 2.5E-07 | 1.6E-03 | 7.9E-04 | 9.9E-01 | 7.6E-01 | 9.7E-01 |
| RN7SL699P     | 3.7E-07             | 1.6E-06 | 2.3E-02 | 8.0E-03 | 6.6E-01 | 9.3E-01 | 9.3E-01 |
| OR4A44P       | 3.9E-07             | 3.8E-05 | 4.9E-03 | 1.3E-03 | 8.4E-01 | 9.8E-01 | 9.3E-01 |
| C7orf71       | 4.8E-07             | 1.2E-07 | 1.6E-04 | 7.2E-04 | 1.0E+00 | 8.9E-01 | 9.8E-01 |
| COMP          | 4.8E-07             | 1.4E-06 | 1.3E-03 | 1.0E-03 | 8.8E-01 | 6.7E-01 | 9.8E-01 |
| PCDHB10       | 5.0E-07             | 1.1E-06 | 5.2E-01 | 1.8E-04 | 9.8E-01 | 8.5E-01 | 8.8E-01 |
| HOXB1         | 5.3E-07             | 7.8E-07 | 3.9E-03 | 7.1E-04 | 9.1E-01 | 9.0E-01 | 9.8E-01 |
| RN7SKP280     | 5.4E-07             | 5.8E-07 | 5.2E-03 | 4.2E-03 | 9.2E-01 | 9.6E-01 | 9.7E-01 |
| SEC31A        | 5.5E-07             | 2.7E-05 | 3.5E-04 | 2.3E-03 | 9.7E-01 | 9.1E-01 | 9.3E-01 |

|               |         |         |         |         |         |         |         |
|---------------|---------|---------|---------|---------|---------|---------|---------|
| RP11-363E6.4  | 6.6E-07 | 8.3E-07 | 3.6E-02 | 1.0E-06 | 9.0E-01 | 9.4E-01 | 9.8E-01 |
| SHISA4        | 6.8E-07 | 4.0E-07 | 1.0E-02 | 3.0E-03 | 9.8E-01 | 5.7E-01 | 9.4E-01 |
| DAZAP2P1      | 8.0E-07 | 3.2E-05 | 6.5E-06 | 1.5E-04 | 9.2E-01 | 1.2E-02 | 3.0E-02 |
| PGLYRP3       | 9.0E-07 | 2.5E-07 | 4.8E-03 | 1.3E-04 | 9.1E-01 | 9.1E-01 | 9.5E-01 |
| RP11-138H8.4  | 1.1E-06 | 1.9E-05 | 2.0E-03 | 1.4E-04 | 9.2E-01 | 6.3E-01 | 9.2E-01 |
| RP11-153M7.3  | 1.1E-06 | 2.5E-04 | 7.0E-03 | 6.0E-04 | 8.7E-01 | 9.6E-01 | 1.0E+00 |
| EPS8L2        | 1.2E-06 | 1.7E-06 | 5.5E-02 | 1.6E-03 | 9.6E-01 | 9.7E-01 | 9.7E-01 |
| HPN           | 1.2E-06 | 4.7E-06 | 2.0E-02 | 1.3E-04 | 7.2E-01 | 9.6E-01 | 9.3E-01 |
| AC092685.1    | 1.3E-06 | 4.0E-04 | 6.5E-06 | 1.1E-04 | 9.8E-01 | 9.0E-01 | 9.2E-01 |
| AC079781.1    | 1.4E-06 | 2.5E-04 | 2.2E-04 | 1.4E-03 | 8.8E-01 | 5.7E-02 | 1.5E-01 |
| CTD-2014B16.2 | 1.4E-06 | 7.1E-06 | 9.8E-06 | 1.3E-03 | 9.5E-01 | 9.6E-01 | 9.8E-01 |
| SULT1B1       | 1.4E-06 | 1.7E-05 | 1.6E-03 | 1.5E-03 | 7.0E-01 | 9.8E-01 | 9.1E-01 |
| RP11-57G22.1  | 1.4E-06 | 3.7E-05 | 8.2E-03 | 1.6E-03 | 8.1E-01 | 2.4E-01 | 6.6E-01 |

---

## sing QRFCCA

---

| PCA     | KCCA    | MSKAT    |
|---------|---------|----------|
| 7.0E-05 | 9.0E-01 | 1.32E-05 |
| 1.2E-01 | 9.3E-01 | 0.000331 |
| 8.2E-05 | 6.9E-01 | 8.87E-09 |
| 5.8E-08 | 3.2E-01 | 6.68E-10 |
| 5.0E-01 | 9.0E-01 | 0.015107 |
| 8.7E-07 | 1.0E+00 | 5.56E-06 |
| 2.4E-02 | 9.6E-01 | 0.027771 |
| 7.8E-06 | 8.1E-01 | 7.64E-06 |
| 3.7E-04 | 6.7E-01 | 1.67E-06 |
| 7.5E-03 | 4.3E-01 | 0.002061 |
| 7.7E-02 | 2.2E-01 | 0.089856 |
| 7.4E-02 | 8.3E-01 | 1.14E-06 |
| 5.5E-02 | 4.6E-01 | 4.04E-06 |
| 4.4E-04 | 1.0E+00 | 0.000662 |
| 2.7E-04 | 1.0E+00 | 2.77E-05 |
| 1.1E-07 | 4.1E-01 | 0.000294 |
| 1.3E-07 | 6.5E-01 | 0.002929 |
| 3.0E-06 | 9.4E-01 | 1.30E-08 |
| 9.9E-01 | 5.6E-01 | 5.76E-06 |
| 2.6E-04 | 9.4E-01 | 5.77E-10 |
| 3.6E-01 | 9.6E-03 | 0.000578 |
| 4.6E-02 | 2.4E-01 | 9.57E-08 |
| 3.9E-06 | 5.3E-01 | 0.018924 |
| 7.8E-01 | 2.6E-01 | 0.000111 |
| 1.1E-02 | 3.6E-01 | 6.43E-06 |
| 9.9E-01 | 1.1E-02 | 0.000469 |
| 5.6E-01 | 2.5E-06 | 0.006229 |
| 2.9E-07 | 8.6E-03 | 0.009645 |
| 8.2E-02 | 9.0E-01 | 7.86E-07 |
| 5.6E-04 | 3.7E-01 | 0.045012 |
| 4.0E-03 | 4.6E-01 | 6.88E-06 |
| 7.6E-02 | 9.2E-01 | 7.73E-05 |
| 2.8E-01 | 7.5E-01 | 0.000329 |
| 7.5E-01 | 4.8E-01 | 6.88E-05 |
| 1.8E-02 | 2.2E-01 | 0.002266 |
| 6.3E-02 | 3.3E-01 | 0.037812 |
| 5.0E-02 | 2.2E-01 | 7.54E-07 |
| 7.3E-01 | 3.7E-01 | 0.001004 |
| 2.1E-03 | 5.1E-01 | 0.240587 |
| 4.4E-02 | 9.2E-01 | 8.68E-07 |
| 1.6E-06 | 3.1E-01 | 0.060277 |

|         |         |          |
|---------|---------|----------|
| 2.7E-01 | 6.3E-01 | 0.008889 |
| 5.2E-01 | 1.0E+00 | 0.002748 |
| 5.4E-06 | 2.7E-06 | 0.009093 |
| 2.3E-01 | 5.7E-01 | 2.34E-06 |
| 1.2E-01 | 3.7E-01 | 2.86E-05 |
| 7.1E-02 | 9.5E-01 | 0.000218 |
| 3.4E-01 | 4.3E-01 | 0.003988 |
| 4.7E-01 | 3.1E-01 | 0.000156 |
| 4.4E-03 | 1.0E+00 | 0.001274 |
| 6.4E-08 | 7.8E-03 | 7.85E-05 |
| 6.4E-02 | 5.4E-01 | 1.48E-07 |
| 9.0E-02 | 9.4E-01 | 0.000431 |
| 2.1E-03 | 3.9E-01 | 0.009357 |

---

Table S19. A list of top ten genes ranked by GAMuT.

| Gene          | Chr | QRFCCA   | GAMuT    |
|---------------|-----|----------|----------|
| AC008694.3    | 5   | 1.39E-08 | 2.43E-06 |
| RP4-742C19.12 | 22  | 1.04E-05 | 2.78E-06 |
| VILL          | 3   | 1.69E-08 | 2.96E-06 |
| RP1-102E24.9  | 12  | 4.32E-08 | 3.06E-06 |
| RNU6-1229P    | 7   | 5.83E-03 | 3.41E-06 |
| TNNT3         | 11  | 4.94E-06 | 3.52E-06 |
| MLN           | 6   | 9.47E-08 | 4.70E-06 |
| CHMP2B        | 3   | 6.03E-08 | 5.06E-06 |
| LINC00443     | 13  | 5.08E-08 | 5.37E-06 |
| RP11-400N9.1  | 2   | 2.73E-05 | 5.41E-06 |

Table S20. A list of P-value of all rare SNPs within gene ADAM19.

|                         | P-value  |
|-------------------------|----------|
| QFCCA (ADAM19)          | 6.07E-11 |
| GAMuT (ADAM19)          | 8.17E-01 |
| SNP or Genomic Position |          |
| rs191008415             | 4.05E-28 |
| 156968065               | 3.18E-25 |
| 156910533               | 1.57E-08 |
| 156990160               | 3.51E-08 |
| rs35911462              | 2.08E-06 |
| 156932396               | 3.20E-06 |
| rs149236204             | 1.93E-04 |
| rs146419018             | 4.76E-04 |
| rs147457580             | 7.28E-04 |
| 156997304               | 8.48E-04 |
| rs139626715             | 6.10E-03 |
| rs201250158             | 8.31E-03 |
| rs143506109             | 3.10E-02 |
| rs188856674             | 3.77E-02 |
| rs149634622             | 4.06E-02 |
| rs188436117             | 4.18E-02 |
| rs34603646              | 4.95E-02 |
| 156954511               | 5.82E-02 |
| rs78468979              | 6.33E-02 |
| rs184699772             | 7.06E-02 |
| 156944190               | 7.81E-02 |
| rs11466758              | 8.18E-02 |
| rs62388506              | 8.18E-02 |
| rs11465266              | 9.26E-02 |
| rs141181941             | 1.03E-01 |
| rs188195103             | 1.15E-01 |
| 156990480               | 1.24E-01 |
| rs184288975             | 1.33E-01 |
| rs141821577             | 1.37E-01 |
| rs115527546             | 1.43E-01 |
| rs62388487              | 1.47E-01 |
| rs115502782             | 1.49E-01 |
| rs139340220             | 1.62E-01 |
| rs4704869               | 1.73E-01 |
| rs114882516             | 1.88E-01 |
| rs56243836              | 1.97E-01 |
| rs116556518             | 2.10E-01 |
| rs7725400               | 2.13E-01 |
| rs11744541              | 2.23E-01 |
| rs72811356              | 2.24E-01 |
| rs55717305              | 2.38E-01 |
| rs11466803              | 2.41E-01 |



|             |          |
|-------------|----------|
| rs151138638 | 2.52E-01 |
| rs184623076 | 2.55E-01 |
| rs185647117 | 2.56E-01 |
| rs143031163 | 2.65E-01 |
| rs72811314  | 2.66E-01 |
| 156933734   | 2.92E-01 |
| rs186859909 | 3.05E-01 |
| rs181070111 | 3.05E-01 |
| rs6556092   | 3.09E-01 |
| rs79116280  | 3.09E-01 |
| rs144608237 | 3.14E-01 |
| rs181426847 | 3.15E-01 |
| rs138725997 | 3.68E-01 |
| rs184205806 | 4.02E-01 |
| rs34882961  | 4.12E-01 |
| rs2902557   | 4.27E-01 |
| rs183481901 | 4.45E-01 |
| rs62388508  | 4.69E-01 |
| rs115525841 | 5.03E-01 |
| rs72811306  | 5.13E-01 |
| rs146616158 | 5.22E-01 |
| rs147490600 | 5.27E-01 |
| rs141699542 | 5.30E-01 |
| rs10078120  | 5.51E-01 |
| rs150874473 | 5.56E-01 |
| rs114799047 | 5.66E-01 |
| 156944672   | 5.79E-01 |
| 156898877   | 5.99E-01 |
| 156937135   | 6.04E-01 |
| rs116298982 | 6.13E-01 |
| rs148264060 | 6.26E-01 |
| rs142509617 | 6.72E-01 |
| rs77760678  | 6.87E-01 |
| rs200159796 | 6.88E-01 |
| rs114064162 | 7.06E-01 |
| rs78564361  | 7.06E-01 |
| rs72811340  | 7.07E-01 |
| 156959046   | 7.10E-01 |
| rs187328397 | 7.19E-01 |
| rs144038216 | 7.55E-01 |
| rs191259967 | 7.57E-01 |
| rs112724886 | 7.59E-01 |
| rs182111619 | 7.60E-01 |
| rs11465245  | 7.65E-01 |
| rs114912544 | 7.67E-01 |
| rs149216255 | 7.76E-01 |
| rs34750645  | 7.82E-01 |

|             |          |
|-------------|----------|
| rs11465265  | 7.89E-01 |
| 156927814   | 7.94E-01 |
| rs115231378 | 8.01E-01 |
| rs62388526  | 8.02E-01 |
| rs56384823  | 8.10E-01 |
| rs11466808  | 8.13E-01 |
| rs149445339 | 8.15E-01 |
| rs183178230 | 8.22E-01 |
| 156989890   | 8.24E-01 |
| rs11465278  | 8.30E-01 |
| rs112307138 | 8.31E-01 |
| rs11466814  | 8.35E-01 |
| rs181287300 | 8.65E-01 |
| rs115133320 | 8.68E-01 |
| rs146558727 | 8.72E-01 |
| rs185494681 | 8.76E-01 |
| rs138324979 | 8.83E-01 |
| rs189254582 | 8.84E-01 |
| rs147064466 | 8.88E-01 |
| 156971132   | 8.94E-01 |
| 156995485   | 9.09E-01 |
| rs113511170 | 9.18E-01 |
| rs189607262 | 9.35E-01 |
| rs11465257  | 9.49E-01 |
| rs61753548  | 9.49E-01 |
| rs114990221 | 9.50E-01 |
| rs181394073 | 9.60E-01 |
| rs141189988 | 9.61E-01 |
| rs111644980 | 9.67E-01 |
| rs150670035 | 9.77E-01 |
| rs143341739 | 9.77E-01 |
| rs11466811  | 9.79E-01 |
| rs72811335  | 9.79E-01 |
| rs78606727  | 9.82E-01 |
| rs188402615 | 9.86E-01 |
| rs11466767  | 9.95E-01 |
| rs146539692 | 9.98E-01 |
| rs75821300  | 9.98E-01 |
| rs115271681 | 9.99E-01 |
| 156958272   | 9.99E-01 |

Table S21. A list of traits which a single gene was associated with.

| Gene          | Chromosome |     |                       |             |
|---------------|------------|-----|-----------------------|-------------|
| CTC-498M16.2  | 5          | ALL | 5.74E-22 HOMA_ir      | 6.56E-26    |
| TRAJ22        | 14         | ALL | 2.16E-20 HOMA_ir      | 3.56E-28    |
| AP000351.10   | 22         | ALL | 2.09E-18 HOMA_ir      | 4.68E-25    |
| HAR1B         | 20         | ALL | 7.81E-18 Creatinine   | 1.23E-51    |
| IGHVII-20-1   | 14         | ALL | 7.49E-16 Creatinine   | 2.01E-29    |
| RP11-4F5.2    | 15         | ALL | 9.94E-16 HOMA_ir      | 2.03E-20    |
| RNVU1-17      | 1          | ALL | 3.90E-13 Total_Fat_Ma | 0.000718852 |
| PNOC          | 8          | ALL | 1.63E-12 VLDL         | 9.15E-09    |
| COTL1P1       | 17         | ALL | 8.71E-12 HOMA_ir      | 7.30E-09    |
| LINC00273     | 16         | ALL | 4.41E-11 Creatinine   | 8.57E-13    |
| snoU13        | 12         | ALL | 4.95E-11 HOMA_ir      | 9.84E-15    |
| ADAM19        | 5          | ALL | 6.07E-11 HOMA_b       | 1.02E-31    |
| CTD-2026G6.2  | 3          | ALL | 1.91E-10 HOMA_b       | 2.57E-22    |
| MIR409        | 14         | ALL | 2.77E-10 Creatinine   | 7.40E-19    |
| RP1-276E15.1  | 11         | ALL | 3.13E-10 Creatinine   | 3.23E-09    |
| HMGN1P6       | 2          | ALL | 4.46E-10 HsCRP        | 0.000126436 |
| HOXA7         | 7          | ALL | 2.18E-09 Creatinine   | 1.41E-24    |
| RNA5SP99      | 2          | ALL | 2.41E-09 Creatinine   | 6.03E-12    |
| AC021660.1    | 3          | ALL | 2.69E-09 Hip          | 0.001745979 |
| RP11-561N12.1 | 7          | ALL | 3.12E-09 HOMA_ir      | 1.80E-13    |
| FBXL5         | 4          | ALL | 4.53E-09 Creatinine   | 6.40E-05    |
| PPIAP23       | 13         | ALL | 5.40E-09 Glucose      | 8.37E-10    |
| HOXB2         | 17         | ALL | 7.00E-09 HOMA_b       | 0.000564076 |
| RP11-170N16.1 | 4          | ALL | 7.09E-09 HOMA_ir      | 4.97E-05    |
| AC008694.3    | 5          | ALL | 1.39E-08 Creatinine   | 0.003954873 |
| VILL          | 3          | ALL | 1.69E-08 Creatinine   | 2.23E-08    |
| KRT27         | 17         | ALL | 2.04E-08 HOMA_ir      | 1.40E-05    |
| RNU6-1243P    | 11         | ALL | 2.28E-08 Creatinine   | 2.75E-05    |
| RP11-6N17.10  | 17         | ALL | 2.49E-08 HOMA_ir      | 1.95E-07    |
| AL358134.2    | 6          | ALL | 2.83E-08 Creatinine   | 1.33E-21    |
| GAPDH         | 12         | ALL | 2.96E-08 Creatinine   | 3.45E-08    |
| DERL1         | 8          | ALL | 3.45E-08 Creatinine   | 5.04E-06    |
| RP1-102E24.9  | 12         | ALL | 4.32E-08 Creatinine   | 5.21E-07    |
| PPBP          | 4          | ALL | 4.79E-08 Creatinine   | 0.000282027 |
| LINC00443     | 13         | ALL | 5.08E-08 Creatinine   | 1.66E-11    |
| RP11-10017.1  | 15         | ALL | 5.19E-08 Glucose      | 2.90E-08    |
| PROCA1        | 17         | ALL | 5.62E-08 HOMA_ir      | 8.28E-07    |
| CHMP2B        | 3          | ALL | 6.03E-08 Creatinine   | 0.002346817 |
| IGKV2-4       | 2          | ALL | 6.33E-08 Creatinine   | 0.000421234 |
| AC017104.1    | 2          | ALL | 8.15E-08 HOMA_ir      | 8.77E-11    |
| RNU6-980P     | 19         | ALL | 8.16E-08 HOMA_ir      | 1.30E-12    |
| AC016691.2    | 2          | ALL | 8.89E-08 Creatinine   | 1.12E-08    |

|               |    |     |          |               |             |
|---------------|----|-----|----------|---------------|-------------|
| RNA5SP19      | 1  | ALL | 9.03E-08 | HOMA_ir       | 9.48E-09    |
| snoU13        | 6  | ALL | 9.16E-08 | HsCRP         | 0.000380108 |
| MLN           | 6  | ALL | 9.47E-08 | Glucose       | 6.24E-11    |
| RP11-55L4.2   | 17 | ALL | 1.03E-07 | HOMA_ir       | 2.18E-11    |
| CTC-505O3.2   | 5  | ALL | 1.22E-07 | Creatinine    | 1.37E-06    |
| ISCA1P1       | 5  | ALL | 1.23E-07 | VLDL          | 1.41E-07    |
| JUN           | 1  | ALL | 1.25E-07 | Creatinine    | 3.44E-20    |
| AC140061.12   | 12 | ALL | 1.41E-07 | Creatinine    | 2.11E-16    |
| RP11-697E2.10 | 15 | ALL | 1.77E-07 | Creatinine    | 2.22E-21    |
| RNU6-717P     | 12 | ALL | 1.91E-07 | HsCRP         | 2.50E-12    |
| RP11-98D18.17 | 1  | ALL | 2.36E-07 | HOMA_ir       | 2.77E-06    |
| PPIAP13       | 10 | ALL | 2.43E-07 | Creatinine    | 1.90E-06    |
| SETP2         | 14 | ALL | 2.67E-07 | Creatinine    | 1.15E-22    |
| AC008691.1    | 5  | ALL | 3.15E-07 | Creatinine    | 2.56E-07    |
| RP1-40E16.2   | 6  | ALL | 3.38E-07 | HsCRP         | 6.49E-10    |
| RP11-79P5.9   | 5  | ALL | 3.54E-07 | Glucose       | 3.99E-07    |
| RN7SL699P     | 17 | ALL | 3.69E-07 | HOMA_ir       | 2.86E-09    |
| OR4A44P       | 11 | ALL | 3.94E-07 | GGT           | 0.005636472 |
| C7orf71       | 7  | ALL | 4.80E-07 | PLT           | 0.000205223 |
| COMP          | 19 | ALL | 4.83E-07 | Creatinine    | 9.58E-15    |
| PCDHB10       | 5  | ALL | 4.97E-07 | HsCRP         | 3.02E-11    |
| HOXB1         | 17 | ALL | 5.27E-07 | HOMA_ir       | 7.99E-07    |
| RN7SKP280     | 7  | ALL | 5.39E-07 | Alkaline      | 0.000294435 |
| SEC31A        | 4  | ALL | 5.51E-07 | Uric_Acid     | 0.000657855 |
| RP11-363E6.4  | 8  | ALL | 6.56E-07 | PLT           | 3.81E-12    |
| SHISA4        | 1  | ALL | 6.84E-07 | HOMA_ir       | 1.48E-08    |
| DAZAP2P1      | 2  | ALL | 7.97E-07 | Creatinine    | 0.000290958 |
| PGLYRP3       | 1  | ALL | 8.97E-07 | Creatinine    | 8.97E-10    |
| RP11-138H8.4  | 15 | ALL | 1.09E-06 | Bilirubin     | 5.60E-05    |
| RP11-153M7.3  | 4  | ALL | 1.10E-06 | PCV           | 0.01321897  |
| EPS8L2        | 11 | ALL | 1.15E-06 | Creatinine    | 2.49E-08    |
| HPN           | 19 | ALL | 1.15E-06 | Creatinine    | 9.61E-07    |
| AC092685.1    | 7  | ALL | 1.34E-06 | Creatinine    | 4.49E-08    |
| AC079781.1    | 7  | ALL | 1.36E-06 | HsCRP         | 1.50E-10    |
| CTD-2014B16.2 | 14 | ALL | 1.41E-06 | Phosphate     | 0.000388972 |
| SULT1B1       | 4  | ALL | 1.43E-06 | TotalCholeste | 0.000987772 |
| RP11-57G22.1  | 18 | ALL | 1.44E-06 | Diastolic_BP  | 0.000361512 |

|             |          |            |          |            |          |            |          |
|-------------|----------|------------|----------|------------|----------|------------|----------|
| Insulin     | 4.26E-11 | Glucose    | 3.84E-08 | Systolic_I | 0.001956 | Diastolic_ | 0.029416 |
| Glucose     | 7.53E-12 | Insulin    | 2.47E-11 | Urea       | 0.006493 | Uric_Acic  | 0.048675 |
| Insulin     | 6.69E-10 | Glucose    | 2.13E-07 | Phosphate  | 0.013555 | Height     | 0.022553 |
| Urea        | 2.17E-07 | GGT        | 0.008421 | WHR        | 0.011319 | Waist      | 0.019045 |
| Urea        | 6.33E-05 | WBC        | 0.010865 | ECG_Hea    | 0.01918  | RR_Interv  | 0.02229  |
| Insulin     | 5.26E-10 | Homocyst   | 2.56E-06 | Glucose    | 0.001579 | HsCRP      | 0.026557 |
| Hip         | 0.000771 | BMI        | 0.001168 | Weight     | 0.001773 | HOMA_i     | 0.002227 |
| Triglycerid | 9.15E-09 | HOMA_i     | 1.21E-07 | Insulin    | 0.002612 | Glucose    | 0.00826  |
| Glucose     | 2.41E-08 | GGT        | 5.35E-07 | Insulin    | 0.006809 |            |          |
| Glucose     | 1.15E-05 | HOMA_i     | 3.35E-05 | LDL        | 0.001232 | TotalChol  | 0.007672 |
| Insulin     | 1.70E-06 | ApoB       | 0.001961 | MCH        | 0.003053 | Glucose    | 0.010992 |
| Creatinine  | 1.16E-05 | Glucose    | 0.002678 | HsCRP      | 0.004913 | Insulin    | 0.029635 |
| GGT         | 6.17E-07 | Bicarbona  | 0.016391 |            |          |            |          |
| Hip         | 7.19E-07 | Total_Lea  | 2.15E-06 | Weight     | 1.65E-05 | BMI        | 0.000148 |
| HOMA_ir     | 7.14E-08 | Insulin    | 1.40E-05 | HOMA_b     | 0.0011   | Homocyst   | 0.001438 |
| HOMA_b      | 0.001411 | HOMA_i     | 0.001467 | Glucose    | 0.041752 |            |          |
| Urea        | 8.97E-06 | HOMA_b     | 0.017358 | Bilirubin  | 0.01787  | Total_Lea  | 0.034116 |
| Diastolic_B | 0.007365 | HsCRP      | 0.019323 | Insulin    | 0.019335 | Bicarbona  | 0.020459 |
| GGT         | 0.002209 | HOMA_b     | 0.005389 | Systolic_I | 0.012018 | BMI        | 0.012338 |
| Glucose     | 7.41E-08 | Insulin    | 5.07E-07 | Sodium     | 1.85E-05 | ApoB       | 0.001165 |
| PCV         | 0.002071 | Hgb        | 0.002115 | Phosphate  | 0.00811  | Alkaline   | 0.022042 |
| Creatinine  | 2.48E-06 | HOMA_i     | 4.31E-06 | Insulin    | 0.001131 | FVC        | 0.002255 |
| Homocyste   | 0.001419 | Hgb        | 0.002353 | PCV        | 0.004896 | Sodium     | 0.008226 |
| Insulin     | 0.01038  | Total_Fat  | 0.01354  | HsCRP      | 0.016426 | FEV1.FV    | 0.022457 |
| ECG_Heart   | 0.005142 | RR_Interv  | 0.006365 | Sodium     | 0.022489 | Bilirubin  | 0.023863 |
| TotalChole  | 0.001057 | LDL        | 0.002498 | ApoB       | 0.002941 | HsCRP      | 0.006357 |
| VLDL        | 0.000197 | Triglyceri | 0.000197 | HsCRP      | 0.000407 | Creatinine | 0.000792 |
| Glucose     | 9.44E-05 | GGT        | 0.002032 | FEV1.FV    | 0.003483 | Total_Lea  | 0.00548  |
| Creatinine  | 2.93E-06 | Insulin    | 3.27E-05 | Diastolic_ | 0.000887 | Glucose    | 0.002072 |
| Urea        | 0.033409 | FVC        | 0.046864 |            |          |            |          |
| HOMA_ir     | 1.43E-05 | VLDL       | 4.62E-05 | Triglyceri | 4.62E-05 | Glucose    | 0.000164 |
| Urea        | 0.000999 | Alkaline   | 0.001949 | Uric_Acic  | 0.003094 | Glucose    | 0.005175 |
| GGT         | 0.001544 | Uric_Acic  | 0.00814  | HsCRP      | 0.008199 | MCV        | 0.017594 |
| HOMA_ir     | 0.001707 | GGT        | 0.006442 | MCH        | 0.03834  | MCV        | 0.039668 |
| Urea        | 0.006732 | Diastolic_ | 0.025616 | HOMA_b     | 0.045981 | Total_Lea  | 0.047506 |
| HOMA_ir     | 6.99E-08 | Creatinine | 5.23E-06 | Bicarbona  | 5.23E-05 | Insulin    | 0.000102 |
| Insulin     | 0.000451 | Phosphate  | 0.002443 | Urea       | 0.00394  | Alkaline   | 0.00543  |
| ApoA1       | 0.006587 | Albumin    | 0.014431 | TotalChol  | 0.015285 | HOMA_i     | 0.015898 |
| ApoB        | 0.002251 | Insulin    | 0.016273 | Glucose    | 0.022997 | TotalChol  | 0.034153 |
| Triglycerid | 3.00E-05 | VLDL       | 3.00E-05 | GGT        | 7.96E-05 | Insulin    | 9.39E-05 |
| Insulin     | 1.61E-06 | Glucose    | 0.000767 | Hip        | 0.020059 | FVC        | 0.028685 |
| HOMA_ir     | 6.26E-07 | HOMA_b     | 2.07E-06 | Insulin    | 1.34E-05 | RBC        | 0.013824 |



---

|                    |                    |                    |                    |                    |  |
|--------------------|--------------------|--------------------|--------------------|--------------------|--|
| 0.02525 ECG_Hea    | 0.03049 RR_Interv  | 0.04365            |                    |                    |  |
| 0.03739            |                    |                    |                    |                    |  |
| 0.03686 QT_Interv  | 0.03774 Systolic_I | 0.03906 Sodium     | 0.03999            |                    |  |
| 0.03519 FEV1       | 0.03717 HOMA_b     | 0.03738            |                    |                    |  |
| 0.0171 Waist       | 0.01799 Total_Lea  | 0.03105 RBC        | 0.04576            |                    |  |
| 0.01372 Albumin    | 0.02241 FEV1.FV    | 0.03082            |                    |                    |  |
| 0.01615 ApoB       | 0.01743 Total_Lea  | 0.01918 Hgb        | 0.02495 Phosphate  | 0.03771 WHR        |  |
| 0.03395 VLDL       | 0.03395            |                    |                    |                    |  |
| 0.00026 Waist      | 0.00035 Uric_Acic  | 0.00206 Total_Fat  | 0.0024 HsCRP       | 0.03814 Insulin    |  |
| 0.00256 RBC        | 0.00636 Urea       | 0.01393 WHR        | 0.01409 BMI        | 0.01537 Total_Lea  |  |
| 0.03621            |                    |                    |                    |                    |  |
| 0.03352 Glucose    | 0.03451 Triglyceri | 0.0478 VLDL        | 0.0478             |                    |  |
| 0.01659 Diastolic_ | 0.01743 Bicarbona  | 0.02732 Sodium     | 0.03585 Height     | 0.03943 HOMA_i     |  |
| 0.00434 FEV1.FV    | 0.00536 BMI        | 0.00849 VLDL       | 0.00979 Triglyceri | 0.00979 Albumin    |  |
| 0.0243             |                    |                    |                    |                    |  |
| 0.00483 FEV1       | 0.00681 Alkaline   | 0.01493 Height     | 0.01873 PLT        | 0.03135 Phosphate  |  |
| 0.00984 ECG_Hea    | 0.01326 Insulin    | 0.01521 RR_Interv  | 0.01787 FEV1.FV    | 0.03069 Diastolic_ |  |
| 0.0271 HOMA_b      | 0.03586 Urea       | 0.04716            |                    |                    |  |
| 0.02777 MCH        | 0.03854 MCV        | 0.04543 HsCRP      | 0.04685            |                    |  |
| 0.0083 BMI         | 0.02207 HOMA_i     | 0.02618 Bicarbona  | 0.04052            |                    |  |
| 0.00328 PLT        | 0.01206 Insulin    | 0.01342 Hgb        | 0.03425 QT_Interv  | 0.04934            |  |
| 0.00642 HOMA_b     | 0.00842 ApoA1      | 0.01216 BMI        | 0.01447 Weight     | 0.03267 Diastolic_ |  |
| 0.0092 ECG_Hea     | 0.00959 Systolic_I | 0.01572 RR_Interv  | 0.01974 Weight     | 0.02842 HDL        |  |
| 0.00113 Systolic_I | 0.03504 Insulin    | 0.0444             |                    |                    |  |
| 0.00884 HOMA_b     | 0.00953 WBC        | 0.01846 Insulin    | 0.02524 VLDL       | 0.04373 Triglyceri |  |
| 0.02181 FEV1.FV    | 0.02501 Urea       | 0.03353 Insulin    | 0.04318 MCH        | 0.04625            |  |
| 0.04319            |                    |                    |                    |                    |  |
| 0.04829 GGT        | 0.04881 QT_Interv  | 0.04924 FEV1       | 0.04952            |                    |  |
| 0.00039 Homocyst   | 0.02875            |                    |                    |                    |  |
| 0.00649 Uric_Acic  | 0.00811 Systolic_I | 0.01451 Creatinine | 0.0187 GGT         | 0.04389            |  |
| 0.02332 Bilirubin  | 0.02373 Hip        | 0.03508 Phosphate  | 0.03719            |                    |  |
| 0.0356             |                    |                    |                    |                    |  |
| 0.00166 Glucose    | 0.00856 Height     | 0.03327 Total_Lea  | 0.04348            |                    |  |
| 0.02979 Sodium     | 0.04044 FEV1       | 0.04109            |                    |                    |  |
| 0.01919 Hip        | 0.02757 BMI        | 0.03119 Systolic_I | 0.03384 MCV        | 0.04497            |  |

|                    |                   |                    |                    |                    |
|--------------------|-------------------|--------------------|--------------------|--------------------|
| 0.00782 RBC        | 0.01174 MCH       | 0.01522 Bilirubin  | 0.02582 BMI        | 0.02987 HsCRP      |
| 0.03343            |                   |                    |                    |                    |
| 0.01294 FVC        | 0.01431 WHR       | 0.02436 Bilirubin  | 0.03443            |                    |
| 0.03015            |                   |                    |                    |                    |
| 0.00216 FEV1       | 0.01157 BMI       | 0.01347 Weight     | 0.02145 Systolic_I | 0.04599 Total_Fat. |
| 0.01947 Total_Lea  | 0.02162 Insulin   | 0.02283 Total_Fat. | 0.02878 Weight     | 0.02913 BMI        |
| 0.02791 VLDL       | 0.0369 Triglyceri | 0.0369 Total_Lea   | 0.04158 Insulin    | 0.04671 Total_Fat. |
| 0.00997 Urea       | 0.03917           |                    |                    |                    |
| 0.00488 RBC        | 0.00767 WBC       | 0.01534 Hgb        | 0.02067 RR_Interv  | 0.02213 Urea       |
| 0.01617 Glucose    | 0.02728           |                    |                    |                    |
| 0.00636 Total_Fat. | 0.01651 RBC       | 0.01796 BMI        | 0.02298 Waist      | 0.03608 LDL        |
| 0.03971            |                   |                    |                    |                    |
| 0.02185 Height     | 0.04661           |                    |                    |                    |
| 0.01971            |                   |                    |                    |                    |
| 0.03197            |                   |                    |                    |                    |
| 0.00745 WHR        | 0.01033 WBC       | 0.01243 Systolic_I | 0.0132 Bicarbona   | 0.03434 QT_Interv  |
| 0.01576 QT_Interv  | 0.02616 GGT       | 0.03635 Bilirubin  | 0.04596 LDL        | 0.04968            |
| 0.04199 FEV1.FV    | 0.0441            |                    |                    |                    |

---



---

0.04524

0.04015

0.02513 WBC      0.029847 Weight      0.030837

0.0475

0.01049 Total\_Fat\_    0.014248 LDL      0.017979 PLT      0.024192 TotalChole    0.025487 Alkaline

0.03718 ApoA1      0.039995 GGT      0.040511

0.03209 GGT      0.03463 HOMA\_ir    0.035082 RBC      0.043982 HsCRP      0.047932

0.03995 Albumin    0.041229

0.02898 Height      0.029157 Total\_Lear    0.031394 Waist      0.036981 BMI      0.040466 Hip

0.04373

0.03668 Total\_Lear 0.03782 Insulin 0.039445 Phosphate 0.042606

0.04808

0.04033 Height 0.045741

0.04797 Homocyste 0.048268

0.03522 Triglycerid 0.043163 VLDL 0.043163

0.03663 Hip 0.037032

0.04624

---

---

0.040268

0.041994 Urea

0.042429

Table S22. Number of genes consisting of only rare variants significantly associated with single trait

| Blood     |           |            |           |        |      |                | Homocysteine |
|-----------|-----------|------------|-----------|--------|------|----------------|--------------|
| Hgb       | MCV       | PCV        | PLT       | RBC    | WBC  | MCH            | Homocysteine |
| 0         | 0         | 0          | 3         | 2      | 0    | 0              | 10           |
| Lipid     |           |            |           |        |      |                | Inflammatory |
| TotalChol | HDL       | LDL        | VLDL      | ApoA1  | ApoB | Triglycerides  | HsCRP        |
| 0         | 0         | 0          | 11        | 0      | 0    | 11             | 72           |
| Kidney    |           |            |           |        |      | Liver          |              |
| Uric Acid | Bicarbona | Creatinine | Phosphate | Sodium | Urea | Albumin        | Alkaline     |
| 0         | 1         | 345        | 0         | 0      | 3    | 0              | 0            |
| Body      |           |            |           |        |      |                | Electrical   |
| Height    | Weight    | BMI        | Waist     | Hip    | WHR  | ECG Heart Rate | RR Interval  |
| 1         | 0         | 0          | 0         | 1      | 0    | 0              | 0            |

it.

| Glycaemia  |         | Insulin Resistance |         |                |
|------------|---------|--------------------|---------|----------------|
| Glucose    | Insulin | HOMA-B             | HOMA-IR |                |
| 21         | 15      | 20                 | 108     |                |
| Extended   |         |                    |         |                |
| Total Fat  |         | Total Lean Mass    |         |                |
| 0          | 0       |                    |         |                |
| Lung       |         |                    |         |                |
| Bilirubin  | GGT     | FVC                | FEV1    | FEV1-FVC-Ratio |
| 2          | 14      | 2                  | 2       | 0              |
| BP         |         |                    |         |                |
| QT Interv: | SBP     | DBP                |         |                |
| 0          | 0       | 1                  |         |                |

Table S23. A list of P-values of top 42 genes with common variants only significantly associated w

| Gene          | Statistical Methods |         |         |         |         |         |         |
|---------------|---------------------|---------|---------|---------|---------|---------|---------|
|               | QRFCCA              | FCCA    | GAMuT   | SCCA    | USAT    | MANOVA  | CCA     |
| UBE2U         | 2.9E-15             | 4.0E-15 | 2.6E-02 | 1.2E-04 | 8.3E-01 | 9.0E-01 | 9.3E-01 |
| BATF2         | 5.9E-15             | 2.3E-11 | 6.9E-01 | 3.2E-03 | 8.0E-02 | 9.3E-01 | 9.6E-01 |
| C5orf51       | 1.0E-14             | 7.1E-15 | 1.0E-03 | 2.0E-06 | 4.9E-01 | 9.8E-01 | 9.6E-01 |
| RP11-814P5.1  | 1.3E-14             | 3.6E-15 | 7.2E-01 | 4.5E-04 | 6.0E-01 | 1.0E+00 | 9.7E-01 |
| USP44         | 3.5E-14             | 1.3E-14 | 2.7E-01 | 1.5E-03 | 8.2E-01 | 9.9E-01 | 9.1E-01 |
| C12orf5       | 4.9E-14             | 5.2E-14 | 4.7E-01 | 1.0E-03 | 6.9E-01 | 9.8E-01 | 9.3E-01 |
| SSH2          | 5.6E-14             | 3.0E-14 | 7.4E-03 | 3.3E-05 | 8.4E-01 | 9.9E-01 | 9.0E-01 |
| PHIP          | 3.0E-13             | 2.5E-13 | 4.2E-01 | 1.7E-05 | 2.5E-01 | 9.8E-01 | 9.2E-01 |
| ARRDC4        | 1.7E-12             | 1.8E-12 | 7.7E-01 | 6.9E-04 | 3.8E-01 | 9.7E-01 | 9.9E-01 |
| RP3-477O4.16  | 4.3E-12             | 9.7E-12 | 9.3E-01 | 2.8E-02 | 5.2E-01 | 1.0E+00 | 1.0E+00 |
| FAM210B       | 5.6E-11             | 2.4E-11 | 2.5E-03 | 1.6E-05 | 3.9E-01 | 9.4E-01 | 9.6E-01 |
| AF001550.7    | 6.5E-11             | 3.3E-11 | 5.8E-02 | 1.5E-04 | 5.9E-01 | 9.3E-01 | 1.0E+00 |
| COLGALT1      | 9.5E-11             | 9.1E-11 | 9.9E-01 | 7.5E-04 | 8.1E-01 | 9.9E-01 | 9.1E-01 |
| IGSF5         | 1.2E-10             | 1.3E-06 | 1.2E-01 | 1.1E-03 | 9.2E-01 | 9.1E-01 | 9.3E-01 |
| GPR137B       | 3.5E-10             | 1.8E-10 | 3.1E-01 | 4.8E-04 | 5.4E-01 | 9.7E-01 | 9.4E-01 |
| RCL1          | 4.9E-10             | 5.3E-09 | 7.1E-02 | 1.0E-06 | 6.1E-01 | 9.8E-01 | 9.6E-01 |
| OXR1          | 1.8E-09             | 3.7E-09 | 4.0E-03 | 1.0E-06 | 9.4E-01 | 9.9E-01 | 9.9E-01 |
| CTD-2503O16.4 | 1.5E-08             | 5.7E-09 | 1.7E-01 | 1.4E-04 | 9.8E-01 | 9.1E-01 | 9.7E-01 |
| C10orf76      | 1.9E-08             | 9.1E-08 | 2.7E-01 | 3.0E-05 | 1.6E-01 | 9.0E-01 | 9.6E-01 |
| SRRM4         | 2.3E-08             | 1.4E-06 | 1.0E-01 | 1.2E-04 | 4.7E-01 | 9.8E-01 | 9.3E-01 |
| RASAL3        | 5.3E-08             | 3.6E-07 | 7.0E-01 | 1.9E-04 | 1.6E-01 | 8.7E-01 | 9.9E-01 |
| MTHFD2P6      | 5.7E-08             | 8.3E-08 | 3.7E-05 | 1.6E-05 | 4.0E-01 | 1.5E-03 | 1.1E-02 |
| UQCRBP3       | 7.6E-08             | 7.5E-08 | 5.4E-01 | 2.3E-03 | 5.0E-01 | 9.3E-01 | 1.0E+00 |
| SEC14L3       | 7.9E-08             | 8.2E-07 | 2.4E-02 | 1.5E-05 | 5.1E-01 | 9.6E-01 | 9.4E-01 |
| UGCG          | 8.0E-08             | 1.1E-07 | 5.5E-01 | 3.0E-03 | 1.4E-01 | 9.4E-01 | 9.7E-01 |
| ZNF680        | 1.2E-07             | 4.0E-05 | 3.1E-01 | 3.8E-04 | 3.2E-01 | 9.1E-01 | 9.3E-01 |
| GPR56         | 1.3E-07             | 3.8E-07 | 6.1E-01 | 6.1E-05 | 3.6E-01 | 9.8E-01 | 9.5E-01 |
| CCDC26        | 2.0E-07             | 2.1E-07 | 1.4E-01 | 1.0E-06 | 1.1E-01 | 9.1E-01 | 9.3E-01 |
| SOX5          | 2.5E-07             | 1.2E-05 | 8.6E-01 | 1.0E-06 | 4.9E-01 | 9.0E-01 | 9.1E-01 |
| AC009892.10   | 3.2E-07             | 4.3E-07 | 9.8E-01 | 2.4E-02 | 3.6E-01 | 4.0E-01 | 6.6E-01 |
| HPSE          | 3.2E-07             | 3.2E-05 | 4.7E-01 | 1.0E-06 | 3.3E-01 | 9.7E-01 | 9.4E-01 |
| SLC35E4       | 5.1E-07             | 1.5E-05 | 3.9E-01 | 3.8E-04 | 7.1E-01 | 9.5E-01 | 9.1E-01 |
| CTC-575D19.1  | 6.3E-07             | 2.7E-06 | 6.5E-01 | 6.8E-04 | 7.6E-01 | 1.0E+00 | 1.0E+00 |
| EFTUD1        | 7.9E-07             | 6.2E-07 | 2.9E-02 | 9.0E-06 | 3.8E-01 | 9.7E-01 | 9.4E-01 |
| RP4-742N3.1   | 9.4E-07             | 4.1E-06 | 1.9E-01 | 1.1E-04 | 7.3E-01 | 9.1E-01 | 9.3E-01 |
| RP11-568J23.7 | 9.7E-07             | 5.5E-04 | 1.0E-02 | 1.5E-03 | 8.1E-01 | 9.8E-01 | 1.0E+00 |
| AC138655.1    | 1.0E-06             | 7.7E-06 | 6.7E-01 | 7.0E-06 | 6.3E-01 | 9.7E-01 | 1.0E+00 |
| EYA4          | 1.0E-06             | 1.1E-04 | 9.0E-01 | 2.1E-04 | 2.4E-01 | 9.4E-01 | 9.6E-01 |
| P2RY6         | 1.1E-06             | 1.4E-06 | 9.2E-01 | 7.0E-04 | 8.7E-01 | 9.5E-01 | 9.5E-01 |
| BACH2         | 1.2E-06             | 1.8E-06 | 6.0E-02 | 5.0E-06 | 6.7E-01 | 9.6E-01 | 9.4E-01 |
| MSH6          | 1.4E-06             | 6.8E-06 | 7.2E-01 | 1.0E-06 | 9.7E-01 | 9.4E-01 | 9.9E-01 |

CTC-497E21.5

| 1.5E-06

4.8E-06

3.3E-01

1.0E-06

4.3E-01

9.5E-01

9.6E-01

ith 46 traits using QRFCCA.

| PCA     | KCCA    | MSKAT    |
|---------|---------|----------|
| 1.1E-01 | 9.0E-01 | 0.647115 |
| 4.2E-01 | 9.5E-01 | 0.012373 |
| 6.4E-01 | 9.7E-01 | 8.23E-05 |
| 3.5E-01 | 9.6E-01 | 0.461213 |
| 5.2E-01 | 9.9E-01 | 0.00138  |
| 5.5E-01 | 9.2E-01 | 0.0199   |
| 2.2E-01 | 9.7E-01 | 0.185851 |
| 7.1E-01 | 9.2E-01 | 0.042022 |
| 8.6E-01 | 9.7E-01 | 0.337233 |
| 8.8E-01 | 9.5E-01 | 0.861207 |
| 5.3E-02 | 9.4E-01 | 0.524432 |
| 9.1E-02 | 9.7E-01 | 0.139853 |
| 5.7E-02 | 9.6E-01 | 0.041859 |
| 1.7E-01 | 9.0E-01 | 0.547865 |
| 5.0E-01 | 9.9E-01 | 0.446398 |
| 5.9E-01 | 9.2E-01 | 0.908544 |
| 6.7E-01 | 9.6E-01 | 0.102838 |
| 1.7E-01 | 9.8E-01 | 0.298597 |
| 1.2E-01 | 9.4E-01 | 0.167248 |
| 3.2E-01 | 9.1E-01 | 0.117424 |
| 3.4E-01 | 9.1E-01 | 0.023521 |
| 2.7E-02 | 9.7E-07 | 2.05E-05 |
| 1.5E-01 | 1.0E+00 | 0.260786 |
| 1.1E-03 | 9.9E-01 | 0.184885 |
| 8.8E-01 | 9.0E-01 | 0.009934 |
| 7.9E-02 | 9.2E-01 | 0.001049 |
| 8.5E-01 | 9.3E-01 | 0.08076  |
| 1.1E-01 | 9.7E-01 | 2.69E-05 |
| 7.9E-01 | 9.3E-01 | 0.13182  |
| 9.2E-01 | 1.0E+00 | 0.986532 |
| 8.0E-01 | 1.0E+00 | 0.173608 |
| 5.6E-01 | 9.6E-01 | 0.00046  |
| 1.1E-01 | 9.4E-01 | 0.018417 |
| 1.5E-01 | 9.5E-01 | 0.153352 |
| 3.4E-02 | 9.5E-01 | 0.213592 |
| 1.6E-01 | 9.9E-01 | 9.47E-05 |
| 1.7E-04 | 9.5E-01 | 0.315623 |
| 6.5E-01 | 9.5E-01 | 0.000302 |
| 7.5E-01 | 9.6E-01 | 0.340408 |
| 5.0E-01 | 9.5E-01 | 0.458542 |
| 4.2E-01 | 9.6E-01 | 0.792843 |



3.7E-01 9.9E-01 0.078548

Table S24. A list of traits which a single gene was associated with.

| Gene          | Chromosome |     |                        |           |
|---------------|------------|-----|------------------------|-----------|
| REG1B         | 2          | ALL | 1.65E-116 HOMA-IR      | 5.02E-94  |
| RP11-665C14.1 | 4          | ALL | 1.38E-93 Creatinine    | 1.39E-187 |
| ZNF160        | 19         | ALL | 1.98E-91 HOMA-IR       | 2.34E-80  |
| LEF1          | 4          | ALL | 7.44E-83 HsCRP         | 1.22E-112 |
| DYNC1H1       | 14         | ALL | 3.46E-58 HOMA-IR       | 4.76E-108 |
| DOCK7         | 1          | ALL | 4.42E-51 HsCRP         | 3.66E-53  |
| SHC3          | 9          | ALL | 7.56E-42 HOMA-IR       | 1.90E-49  |
| Y_RNA         | 7          | ALL | 1.89E-36 HsCRP         | 1.04E-71  |
| CTD-2122P11.1 | 5          | ALL | 1.62E-33 HsCRP         | 3.86E-45  |
| GBF1          | 10         | ALL | 6.30E-28 HOMA-B        | 2.91E-17  |
| RP1-8B22.1    | 1          | ALL | 1.75E-27 HOMA-B        | 2.03E-26  |
| VPS13D        | 1          | ALL | 2.62E-26 Creatinine    | 1.41E-17  |
| RP11-68I3.2   | 17         | ALL | 3.20E-24 Creatinine    | 1.04E-46  |
| SLC13A3       | 20         | ALL | 8.51E-24 HsCRP         | 2.03E-13  |
| RP11-167N24.3 | 12         | ALL | 4.33E-23 HOMA-B        | 6.43E-18  |
| UBA6          | 4          | ALL | 5.26E-22 Creatinine    | 1.04E-42  |
| GAN           | 16         | ALL | 1.49E-21 HsCRP         | 1.04E-15  |
| RP4-794H19.2  | 1          | ALL | 4.07E-21 HOMA-IR       | 4.85E-19  |
| RP11-142I20.1 | 18         | ALL | 5.29E-21 HsCRP         | 3.22E-18  |
| METAP2        | 12         | ALL | 2.62E-20 HOMA-B        | 3.14E-32  |
| SLCO1C1       | 12         | ALL | 5.89E-20 HOMA-B        | 4.25E-08  |
| AC105443.2    | 7          | ALL | 2.47E-17 HsCRP         | 1.01E-46  |
| GRN           | 17         | ALL | 1.63E-16 HOMA-IR       | 2.28E-29  |
| INTS12        | 4          | ALL | 1.72E-16 HsCRP         | 3.85E-27  |
| RP11-323I15.5 | 15         | ALL | 9.29E-16 Homocysteine  | 1.42E-07  |
| UBE2U         | 1          | ALL | 2.88E-15 PLT           | 6.44E-16  |
| BATF2         | 11         | ALL | 5.90E-15 HsCRP         | 4.68E-47  |
| C5orf51       | 5          | ALL | 1.02E-14 Glucose       | 2.30E-18  |
| RP11-814P5.1  | 15         | ALL | 1.28E-14 Creatinine    | 1.66E-32  |
| USP44         | 12         | ALL | 3.49E-14 HsCRP         | 1.81E-31  |
| C12orf5       | 12         | ALL | 4.91E-14 Creatinine    | 1.16E-15  |
| SSH2          | 17         | ALL | 5.59E-14 RR_Interval   | 6.94E-07  |
| PHIP          | 6          | ALL | 2.96E-13 HsCRP         | 7.78E-34  |
| ARRDC4        | 15         | ALL | 1.73E-12 Creatinine    | 3.09E-10  |
| RP3-477O4.16  | 20         | ALL | 4.33E-12 Creatinine    | 3.23E-32  |
| FAM210B       | 20         | ALL | 5.59E-11 Triglycerides | 2.99E-11  |
| AF001550.7    | 16         | ALL | 6.53E-11 HsCRP         | 3.47E-15  |
| COLGALT1      | 19         | ALL | 9.53E-11 HOMA-B        | 1.43E-18  |
| IGSF5         | 21         | ALL | 1.24E-10 Triglycerides | 5.02E-25  |
| GPR137B       | 1          | ALL | 3.54E-10 GGT           | 6.49E-09  |
| RCL1          | 9          | ALL | 4.88E-10 Creatinine    | 6.46E-09  |
| OXR1          | 8          | ALL | 1.77E-09 Creatinine    | 2.27E-05  |

|               |    |     |                        |             |
|---------------|----|-----|------------------------|-------------|
| CTD-2503O16.4 | 5  | ALL | 1.48E-08 HsCRP         | 2.40E-05    |
| C10orf76      | 10 | ALL | 1.89E-08 HOMA-IR       | 1.03E-12    |
| SRRM4         | 12 | ALL | 2.26E-08 HsCRP         | 4.14E-06    |
| RASAL3        | 19 | ALL | 5.31E-08 Creatinine    | 4.60E-07    |
| MTHFD2P6      | 5  | ALL | 5.65E-08 Total_Fat_Mas | 3.09E-06    |
| UQCRBP3       | 5  | ALL | 7.58E-08 Glucose       | 5.54E-06    |
| SEC14L3       | 22 | ALL | 7.90E-08 Bilirubin     | 0.000531772 |
| UGCG          | 9  | ALL | 7.98E-08 HOMA-IR       | 1.70E-08    |
| ZNF680        | 7  | ALL | 1.23E-07 HOMA-B        | 2.43E-10    |
| GPR56         | 16 | ALL | 1.26E-07 Total_Fat_Mas | 0.000154365 |
| CCDC26        | 8  | ALL | 1.97E-07 Diastolic_BP  | 0.000755246 |
| SOX5          | 12 | ALL | 2.54E-07 Creatinine    | 0.001588142 |
| AC009892.10   | 19 | ALL | 3.17E-07 HOMA-IR       | 1.82E-11    |
| HPSE          | 4  | ALL | 3.21E-07 FEV1.FVC_Ra   | 5.85E-06    |
| SLC35E4       | 22 | ALL | 5.08E-07 HOMA-IR       | 8.74E-28    |
| CTC-575D19.1  | 5  | ALL | 6.25E-07 ApoB          | 0.000153801 |
| EFTUD1        | 15 | ALL | 7.87E-07 QT_Interval   | 0.000109083 |
| RP4-742N3.1   | 7  | ALL | 9.42E-07 HOMA-IR       | 1.06E-10    |
| RP11-568J23.7 | 16 | ALL | 9.69E-07 Creatinine    | 2.46E-12    |
| AC138655.1    | 2  | ALL | 1.01E-06 Total_Fat_Mas | 2.24E-06    |
| EYA4          | 6  | ALL | 1.05E-06 HDL           | 0.000701759 |
| P2RY6         | 11 | ALL | 1.11E-06 HsCRP         | 9.58E-22    |
| BACH2         | 6  | ALL | 1.24E-06 Height        | 0.001786206 |
| MSH6          | 2  | ALL | 1.42E-06 Homocysteine  | 4.24E-06    |
| CTC-497E21.5  | 11 | ALL | 1.49E-06 HOMA-IR       | 1.54E-06    |

|                |          |                  |          |                 |          |
|----------------|----------|------------------|----------|-----------------|----------|
| Insulin        | 1.81E-24 | VLDL             | 2.72E-23 | Triglycerides   | 2.72E-23 |
| Urea           | 4.04E-13 | HOMA-IR          | 6.55E-10 | Insulin         | 1.23E-06 |
| Glucose        | 6.20E-46 | Insulin          | 3.02E-18 | HsCRP           | 1.44E-15 |
| HOMA-B         | 7.17E-52 | Homocysteine     | 2.24E-14 | Sodium          | 0.000119 |
| Insulin        | 2.83E-28 | Glucose          | 1.07E-10 | Creatinine      | 2.57E-09 |
| HOMA-B         | 6.42E-13 | FEV1.FVC_Ratio   | 9.00E-07 | BMI             | 9.36E-07 |
| Creatinine     | 5.69E-14 | Insulin          | 1.66E-13 | Glucose         | 2.43E-06 |
| Creatinine     | 0.000461 | BMI              | 0.002677 | Homocysteine    | 0.002837 |
| HOMA-B         | 3.77E-09 | Waist            | 2.55E-07 | Hip             | 4.46E-06 |
| Weight         | 1.37E-05 | Total_Lean_Mass  | 6.16E-05 | Waist           | 7.70E-05 |
| Creatinine     | 4.49E-13 | TotalCholesterol | 0.000584 | LDL             | 0.001085 |
| VLDL           | 6.07E-12 | Triglycerides    | 6.07E-12 | HOMA-B          | 1.32E-09 |
| HOMA-B         | 7.06E-10 | Urea             | 0.002398 | Insulin         | 0.002598 |
| GGT            | 3.12E-08 | HOMA-B           | 1.21E-07 | VLDL            | 4.85E-06 |
| GGT            | 3.89E-12 | Glucose          | 2.68E-05 | Hgb             | 0.006287 |
| HOMA-B         | 3.76E-14 | BMI              | 4.16E-06 | Urea            | 1.07E-05 |
| HOMA-B         | 3.79E-13 | Glucose          | 8.21E-06 | FEV1.FVC_Ratio  | 0.000691 |
| Creatinine     | 3.18E-06 | Insulin          | 2.56E-05 | HOMA-B          | 4.27E-05 |
| HOMA-B         | 1.11E-05 | WHR              | 0.001233 | VLDL            | 0.008252 |
| HOMA-IR        | 3.73E-17 | Insulin          | 8.61E-10 | Glucose         | 2.41E-05 |
| HOMA-IR        | 9.80E-07 | Glucose          | 7.22E-05 | Insulin         | 0.00016  |
| HOMA-B         | 3.19E-07 | WHR              | 0.000333 | Insulin         | 0.00095  |
| Insulin        | 7.89E-10 | Creatinine       | 1.52E-05 | Bicarbonate     | 0.000866 |
| Creatinine     | 4.57E-07 | Weight           | 0.000154 | Total_Fat_Mass  | 0.000261 |
| PLT            | 7.61E-07 | MCH              | 9.69E-05 | MCV             | 0.000147 |
| Bilirubin      | 3.55E-05 | HOMA-B           | 0.001161 | LDL             | 0.001454 |
| HDL            | 0.043139 | Phosphate        | 0.044932 |                 |          |
| Total_Fat_Mass | 3.75E-05 | Hip              | 0.000112 | BMI             | 0.000167 |
| HOMA-IR        | 0.000354 | Weight           | 0.005078 | Total_Lean_Mass | 0.005568 |
| HOMA-IR        | 7.75E-11 | PLT              | 5.99E-05 | Glucose         | 0.004112 |
| GGT            | 1.41E-06 | HOMA-IR          | 2.80E-06 | Homocysteine    | 0.000104 |
| ECG_HeartRate  | 5.29E-06 | QT_Interval      | 0.001606 | Bilirubin       | 0.002129 |
| HOMA-B         | 3.87E-10 | Phosphate        | 0.015091 | Weight          | 0.037039 |
| HsCRP          | 1.12E-06 | Glucose          | 1.31E-06 | FEV1.FVC_Ratio  | 7.38E-05 |
| Urea           | 0.004779 | Triglycerides    | 0.005126 | VLDL            | 0.005126 |
| VLDL           | 2.99E-11 | Bilirubin        | 9.32E-07 | HOMA-IR         | 1.25E-06 |
| Hip            | 0.005354 | Bilirubin        | 0.015295 | Glucose         | 0.027995 |
| HOMA-IR        | 0.000917 | Diastolic_BP     | 0.00571  | Glucose         | 0.009317 |
| VLDL           | 5.02E-25 | Alkaline         | 0.002263 | PLT             | 0.00899  |
| HOMA-B         | 1.06E-07 | MCV              | 0.00048  | Height          | 0.000577 |
| Glucose        | 0.004099 | ApoB             | 0.004803 | HOMA-IR         | 0.029542 |
| Glucose        | 0.000568 | Homocysteine     | 0.002654 | Urea            | 0.004073 |

|              |                       |                           |          |
|--------------|-----------------------|---------------------------|----------|
| PLT          | 0.000443 VLDL         | 0.022382 Triglycerides    | 0.022382 |
| Glucose      | 2.11E-11 HsCRP        | 3.57E-09 Insulin          | 0.000125 |
| Creatinine   | 0.00041 Hgb           | 0.00344 Alkaline          | 0.004603 |
| HsCRP        | 1.25E-05 Phosphate    | 0.006127 TotalCholesterol | 0.013511 |
| Hip          | 7.59E-06 Weight       | 8.23E-06 BMI              | 1.34E-05 |
| Alkaline     | 0.000196 Hip          | 0.001602 Weight           | 0.004886 |
| ApoA1        | 0.000565 WBC          | 0.000922 GGT              | 0.014172 |
| Insulin      | 0.003289 Weight       | 0.004129 Total_Lean_Mass  | 0.005566 |
| HsCRP        | 0.001447 Hip          | 0.001457 Weight           | 0.001727 |
| Phosphate    | 0.002479 Albumin      | 0.004063 HOMA-IR          | 0.007726 |
| WBC          | 0.008621 Homocysteine | 0.010815 PCV              | 0.011788 |
| Insulin      | 7.18E-05 Glucose      | 0.021864                  |          |
| RBC          | 1.85E-05 PCV          | 0.000236 FEV1             | 0.001912 |
| Insulin      | 2.33E-08 Glucose      | 0.000238 RR_Interval      | 0.001502 |
| HOMA-B       | 0.000771 HDL          | 0.001531 Albumin          | 0.001641 |
| PCV          | 0.001651 Bilirubin    | 0.003559 Weight           | 0.011849 |
| Insulin      | 0.000664 Glucose      | 0.001042 PCV              | 0.013281 |
| Bicarbonate  | 0.000883 GGT          | 0.001962 VLDL             | 0.004607 |
| Waist        | 3.95E-06 Hip          | 6.58E-06 Weight           | 2.10E-05 |
| ApoA1        | 0.00644 Alkaline      | 0.007152 ApoB             | 0.008848 |
| Homocysteine | 5.46E-06 WBC          | 0.000756 Systolic_BP      | 0.02079  |
| Systolic_BP  | 0.00394 Creatinine    | 0.008234 Albumin          | 0.019751 |
| PLT          | 0.001577 HOMA-B       | 0.002078 Uric_Acid        | 0.008233 |
| Uric_Acid    | 0.001223 Insulin      | 0.001659 Glucose          | 0.034376 |

---

|                 |          |                 |          |                 |          |
|-----------------|----------|-----------------|----------|-----------------|----------|
| PLT             | 2.09E-22 | Glucose         | 1.31E-21 | Urea            | 0.001561 |
| Glucose         | 1.70E-05 | WHR             | 0.000901 | Hgb             | 0.008246 |
| GGT             | 1.59E-07 | Alkaline        | 0.000339 | ApoB            | 0.000795 |
| RR_Interval     | 0.0054   | FEV1.FVC_Ratio  | 0.01839  | ECG_HeartRate   | 0.033583 |
| RBC             | 0.002369 |                 |          |                 |          |
| Weight          | 1.23E-05 | Hip             | 0.000329 | Total_Fat_Mass  | 0.000794 |
| PCV             | 9.33E-05 | QT_Interval     | 0.000714 | Sodium          | 0.000903 |
| Weight          | 0.004683 | Urea            | 0.005013 | Hip             | 0.015885 |
| Weight          | 4.52E-06 | Total_Fat_Mass  | 9.47E-06 | BMI             | 1.70E-05 |
| BMI             | 7.76E-05 | Hip             | 0.00019  | MCH             | 0.000218 |
| MCV             | 0.003455 | MCH             | 0.004398 | ApoB            | 0.008071 |
| HOMA-IR         | 1.02E-06 | Urea            | 0.001802 | Albumin         | 0.005415 |
| Triglycerides   | 0.004864 | VLDL            | 0.004864 | Albumin         | 0.041153 |
| Triglycerides   | 4.85E-06 | Glucose         | 0.000181 | FEV1.FVC_Ratio  | 0.000203 |
| ApoA1           | 0.008889 | PLT             | 0.010418 | Uric_Acid       | 0.010497 |
| Weight          | 0.000153 | PCV             | 0.000156 | Hip             | 0.000186 |
| PLT             | 0.00521  | RR_Interval     | 0.00715  | VLDL            | 0.037518 |
| Triglycerides   | 4.29E-05 | VLDL            | 4.29E-05 | HDL             | 0.000786 |
| Triglycerides   | 0.008252 | Sodium          | 0.013139 | RR_Interval     | 0.0485   |
| Height          | 0.008252 | Uric_Acid       | 0.013208 | WHR             | 0.014709 |
| FVC             | 0.008165 | Hgb             | 0.009453 | Albumin         | 0.02424  |
| BMI             | 0.005179 | Total_Lean_Mass | 0.008607 | ECG_HeartRate   | 0.010927 |
| Waist           | 0.002229 | Uric_Acid       | 0.003206 | HDL             | 0.003898 |
| BMI             | 0.000288 | Diastolic_BP    | 0.000306 | FVC             | 0.001513 |
| HOMA-B          | 0.000856 | Diastolic_BP    | 0.010965 | RR_Interval     | 0.022709 |
| ApoB            | 0.002595 | WBC             | 0.002639 | ApoA1           | 0.007485 |
| Weight          | 0.000228 | Waist           | 0.000846 | VLDL            | 0.002308 |
| Urea            | 0.017938 | BMI             | 0.018468 | RBC             | 0.021578 |
| Insulin         | 0.007591 |                 |          |                 |          |
| Height          | 0.010275 | Urea            | 0.015338 | Insulin         | 0.034351 |
| Height          | 0.022761 | ApoA1           | 0.027094 | GGT             | 0.030202 |
| Sodium          | 0.000159 |                 |          |                 |          |
| Insulin         | 3.73E-05 | RR_Interval     | 0.000234 | Total_Lean_Mass | 0.00054  |
| Total_Lean_Mass | 0.030428 | GGT             | 0.031343 | Weight          | 0.032576 |
| Height          | 0.045353 | LDL             | 0.047224 |                 |          |
| PCV             | 0.011564 | Hgb             | 0.033835 | RBC             | 0.035129 |
| MCH             | 0.00064  | Phosphate       | 0.04973  |                 |          |
| Urea            | 0.048241 |                 |          |                 |          |
| Systolic_BP     | 0.014734 | GGT             | 0.035515 | WBC             | 0.048575 |

|                |          |                 |          |                          |
|----------------|----------|-----------------|----------|--------------------------|
| Total_Fat_Mass | 0.035956 | Phosphate       | 0.040017 |                          |
| RBC            | 0.00609  | Albumin         | 0.016666 | HDL 0.038753             |
| PCV            | 0.02823  | ECG_HeartRate   | 0.038164 | WHR 0.042638             |
| Bicarbonate    | 0.035498 | Total_Lean_Mass | 0.044415 |                          |
| Waist          | 2.70E-05 | Glucose         | 0.000789 | Total_Lean_Mass 0.000936 |
| BMI            | 0.005105 | Total_Lean_Mass | 0.006675 |                          |
| WHR            | 0.029127 | Waist           | 0.038068 |                          |
| BMI            | 0.007046 | PCV             | 0.007442 | Urea 0.012348            |
| BMI            | 0.002234 | Waist           | 0.003188 | HDL 0.00408              |
| HOMA-IR        | 0.012135 | Height          | 0.041186 |                          |
| Hgb            | 0.002284 | Triglycerides   | 0.005669 | VLDL 0.005669            |
| ECG_HeartRate  | 0.004691 |                 |          |                          |
| ApoA1          | 0.002871 | Sodium          | 0.003639 | Waist 0.010095           |
| BMI            | 0.012308 | MCV             | 0.013736 | Creatinine 0.016137      |
| Diastolic_BP   | 0.028085 | Triglycerides   | 0.031963 | VLDL 0.031963            |
| Triglycerides  | 0.004607 | Diastolic_BP    | 0.012267 |                          |
| BMI            | 3.32E-05 | Insulin         | 0.000104 | HOMA-B 0.000198          |
| ECG_HeartRate  | 0.018078 | Systolic_BP     | 0.020054 | Homocysteine 0.03018     |
| Sodium         | 0.032962 | HOMA-B          | 0.048787 |                          |
| Urea           | 0.010551 | WHR             | 0.021964 |                          |

---

|                  |          |            |         |                 |         |
|------------------|----------|------------|---------|-----------------|---------|
| Bilirubin        | 0.003339 | ApoA1      | 0.01104 | Bicarbonate     | 0.02593 |
| Triglycerides    | 0.01328  | VLDL       | 0.01328 | Bilirubin       | 0.0156  |
| WBC              | 0.000861 | Uric_Acid  | 0.0019  | Urea            | 0.00247 |
| Waist            | 0.001016 | MCV        | 0.00719 | WHR             | 0.00821 |
| Homocysteine     | 0.000927 | Total_Fat_ | 0.00097 | Hgb             | 0.00147 |
| Total_Fat_Mass   | 0.028278 | Uric_Acid  | 0.04458 | Waist           | 0.04702 |
| Glucose          | 5.16E-05 | Bilirubin  | 0.00038 | Albumin         | 0.00074 |
| Total_Fat_Mass   | 0.000324 | RR_Interv  | 0.00129 | MCV             | 0.00244 |
| PCV              | 0.039889 | Urea       | 0.04213 |                 |         |
| Weight           | 0.005525 | Uric_Acid  | 0.00573 | Total_Lean_Mass | 0.00836 |
| Height           | 0.043719 |            |         |                 |         |
| Homocysteine     | 0.002334 | WBC        | 0.00803 | RR_Interval     | 0.00816 |
| Height           | 0.010503 | FEV1.FV1   | 0.03703 | Alkaline        | 0.03774 |
| Hgb              | 0.000299 | Total_Lea  | 0.00056 | Waist           | 0.00136 |
| Triglycerides    | 0.037518 | ECG_Hea    | 0.04026 | QT_Interval     | 0.04668 |
| Glucose          | 0.006554 | MCV        | 0.03515 | ApoA1           | 0.04226 |
| Urea             | 0.040728 |            |         |                 |         |
| PCV              | 0.030418 | WHR        | 0.03142 | FEV1            | 0.03518 |
| Urea             | 0.013039 | Weight     | 0.02942 | Waist           | 0.04994 |
| Triglycerides    | 0.016871 | VLDL       | 0.01687 | WBC             | 0.02665 |
| Waist            | 0.005047 | Systolic_E | 0.00506 | Insulin         | 0.00983 |
| ECG_HeartRate    | 0.023678 | QT_Interv  | 0.03694 | WHR             | 0.04544 |
| TotalCholesterol | 0.00909  | Albumin    | 0.01882 |                 |         |
| Triglycerides    | 0.002308 | Creatinine | 0.00518 | Total_Lean_Mass | 0.02466 |
| HsCRP            | 0.035597 | Hip        | 0.03774 | Total_Fat_Mass  | 0.03868 |
| RR_Interval      | 0.045788 | Total_Lea  | 0.04725 |                 |         |
| Weight           | 0.035397 | Phosphate  | 0.04154 |                 |         |
| Hip              | 0.001597 | Weight     | 0.00163 | ECG_HeartRate   | 0.00205 |
| Phosphate        | 0.036744 | PLT        | 0.04983 |                 |         |
| Diastolic_BP     | 0.048804 |            |         |                 |         |



|                 |                     |                       |         |
|-----------------|---------------------|-----------------------|---------|
| PLT             | 0.001363 Creatinine | 0.01492 Triglycerides | 0.03008 |
| Total_Fat_Mass  | 0.015874 Hgb        | 0.03062 Hip           | 0.03753 |
| PLT             | 0.007771 Bilirubin  | 0.00968 Urea          | 0.01288 |
| Sodium          | 0.035945 BMI        | 0.04015 HOMA-IR       | 0.0414  |
| Insulin         | 0.012658 QT_Interv  | 0.01341 Phosphate     | 0.02754 |
| Total_Lean_Mass | 0.030202 Total_Fat  | 0.03398 RBC           | 0.04251 |
| Hgb             | 0.039197 Albumin    | 0.04169               |         |
| Uric_Acid       | 0.000326 Total_Lea  | 0.00247 Diastolic_BP  | 0.0074  |
| Diastolic_BP    | 0.038143 WBC        | 0.04066               |         |

---

|                 |         |                |                                   |
|-----------------|---------|----------------|-----------------------------------|
| Alkaline        | 0.03522 |                |                                   |
| Bicarbonate     | 0.03188 | Homocysteine   | 0.03202                           |
| MCH             | 0.01115 | Bilirubin      | 0.01316 WHR 0.01544 MCV           |
| Total_Lean_Mass | 0.00937 | ApoB           | 0.01441 Bilirubin 0.0146 MCH      |
| Weight          | 0.00157 | BMI            | 0.00258 RBC 0.00321 WBC           |
| Total_Lean_Mass | 0.00107 | FEV1.FVC_Ratio | 0.00341 GGT 0.0044 WBC            |
| QT_Interval     | 0.00366 | Hgb            | 0.00458 LDL 0.01044 HDL           |
| BMI             | 0.01097 | Bilirubin      | 0.03248 LDL 0.03263 Hip           |
| QT_Interval     | 0.01406 | HDL            | 0.01604 ApoA1 0.02886 Sodium      |
| Total_Lean_Mass | 0.03806 | PCV            | 0.04273 Bicarbona 0.04298 HDL     |
| RBC             | 0.00139 | Total_Fat_Mass | 0.00661 Insulin 0.00785 Bilirubin |
| Weight          | 0.04664 |                |                                   |
| Glucose         | 0.02759 | Hip            | 0.0309 Diastolic_ 0.03633 Albumin |
| Homocysteine    | 0.01109 | FEV1           | 0.01287 Albumin 0.01523 WBC       |
| Systolic_BP     | 0.04897 |                |                                   |
| Bilirubin       | 0.04091 |                |                                   |
| Bicarbonate     | 0.04538 |                |                                   |
| BMI             | 0.0023  | Glucose        | 0.0296                            |

|         |                       |                    |                  |
|---------|-----------------------|--------------------|------------------|
| VLDL    | 0.03008 Insulin       | 0.03262 RBC        | 0.03332 WBC      |
| WBC     | 0.04381               |                    |                  |
| ApoA1   | 0.01469 Homocysteine  | 0.02003 Creatinine | 0.03036          |
| WBC     | 0.03174 ECG_HeartRate | 0.0337 Glucose     | 0.03528 FEV1.FVC |
| Hgb     | 0.04311 Glucose       | 0.0448             |                  |
| Glucose | 0.04032 HsCRP         | 0.04368 Creatinine | 0.04573          |

---

---

---

0.02861 Waist      0.03393

0.03141 Urea      0.04543

0.00396 PLT      0.00577 Hip      0.00778 Total\_Lea    0.04461

0.03371

0.02101 ECG\_Hea    0.03429 HsCRP      0.04106 WHR      0.04756

0.04276 FVC      0.04688

0.03993 ECG\_Hea    0.04519 Insulin      0.04895

0.04587

0.01278 PLT      0.02546 ApoA1      0.04789

0.0425

0.01906 GGT      0.02066 Height      0.02288 Hip      0.03367 Uric\_Acid    0.03734

0.03762

0.04553 LDL

0.0478 Uric\_Acid 0.04891

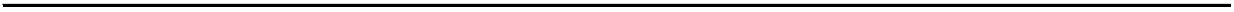

Table S25. Number of genes consisting of only common variants significantly associated with si

| Blood     |           |            |           |        |      |              | Homocysteine |  |
|-----------|-----------|------------|-----------|--------|------|--------------|--------------|--|
| Hgb       | MCV       | PCV        | PLT       | RBC    | WBC  | MCH          | Homocysteine |  |
| 0         | 1         | 0          | 4         | 0      | 0    | 1            | 2            |  |
| Lipid     |           |            |           |        |      | Inflammatory |              |  |
| TotalChol | HDL       | LDL        | VLDL      | ApoA1  | ApoB | Triglyceric  | HsCRP        |  |
| 0         | 0         | 0          | 6         | 0      | 1    | 6            | 29           |  |
| Kidney    |           |            |           |        |      |              | Liver        |  |
| Uric Acid | Bicarbona | Creatinine | Phosphate | Sodium | Urea | Albumin      | Alkaline     |  |
| 0         | 0         | 34         | 0         | 0      | 1    | 0            | 0            |  |
| Body      |           |            |           |        |      |              | Electrical   |  |
| Height    | Weight    | BMI        | Waist     | Hip    | WHR  | ECG Hear     | RR Interval  |  |
| 0         | 0         | 1          | 3         | 0      | 0    | 0            | 1            |  |

single trait.

| Glycaemia  |         | Insulin Resistance |         |                |
|------------|---------|--------------------|---------|----------------|
| Glucose    | Insulin | HOMA-B             | HOMA-IR |                |
| 9          | 8       | 23                 | 23      |                |
| Extended   |         |                    |         |                |
| Total Fat  |         | Total Lean Mass    |         |                |
| 1          | 1       |                    |         |                |
| Lung       |         |                    |         |                |
| Bilirubin  | GGT     | FVC                | FEV1    | FEV1-FVC-Ratio |
| 3          | 7       | 0                  | 0       | 1              |
| BP         |         |                    |         |                |
| QT Interv: | SBP     | DBP                |         |                |
| 0          | 0       | 0                  |         |                |
